# Supplementary material for: Fluorescence of pyrene and its derivatives to reveal constituent and composition dependent solvation within hydrophobic deep eutectic solvents
Source: Royal Society of Chemistry journal article supplement (doi:10.1039/d3cp01207g), 2023-01-01
Supplement: d3cp01207g1.pdf [file d3cp01207g1.pdf]

## **ELECTRONIC SUPPORTING INFORMATION (ESI)**

### **Fluorescence of pyrene and its derivatives to reveal constituent and composition dependent solvation within hydrophobic deep eutectic solvents**

Deepika, Shreya Juneja, and Siddharth Pandey\*

Department of Chemistry, Indian Institute of Technology Delhi, Hauz Khas, New Delhi –  
110016, India.

\*Corresponding Author. Phone: +91-11-26596503, Fax: +91-11-26581102,

E-mail: sipandey@chemistry.iitd.ac.in

## Table of Contents

|           | <b>Page No.</b> |
|-----------|-----------------|
| Table S1  | S3              |
| Table S2  | S4              |
| Table S3  | S5              |
| Table S4  | S7              |
| Table S5  | S9              |
| Table S6  | S11             |
| Table S7  | S13             |
| Table S8  | S15             |
| Table S9  | S17             |
| Table S10 | S19             |
| Table S11 | S20             |
| Fig. S1   | S21             |
| Fig. S2   | S22             |
| Fig. S3   | S23             |
| Fig. S4   | S24             |
| Fig. S5   | S25             |
| Fig. S6   | S26             |
| Fig. S7   | S27             |
| Fig. S8   | S28             |
| Fig. S9   | S29             |
| Fig. S10  | S30             |
| Fig. S11  | S31             |
| Fig. S12  | S32             |
| Fig. S13  | S33             |
| Fig. S14  | S34             |
| Fig. S15  | S35             |
| Fig. S16  | S36             |
| Fig. S17  | S37             |

**Table S1.** Comparison of the Ratio of Band I-to-Band III Emission Intensities of Pyrene (Py  $I_1/I_3$ ) Dissolved in DESs Investigated in this Work ( $\lambda_{\text{ex}} = 337$  nm; slit: excitation/emission = 1.0/1.0 nm) with Solvent Systems Reported in Literature at 298.15 K (unless stated otherwise)

| DES                                                   | Py $I_1/I_3^a$ | solvent                                    | Py $I_1/I_3^b$ |
|-------------------------------------------------------|----------------|--------------------------------------------|----------------|
| Thy : Men                                             |                | Ethaline                                   | 2.14           |
| 1 : 1                                                 | 0.96           | Glyceline                                  | 2.21           |
| 1 : 2                                                 | 0.89           | Reline                                     | 2.51           |
| DA : Men                                              |                |                                            |                |
| 1 : 1                                                 | 0.78           | [bmim][BF <sub>4</sub> ]                   | 2.01           |
| 1 : 2                                                 | 0.78           | [bmim][PF <sub>6</sub> ]                   | 1.92           |
| Thy : DA                                              |                | [N <sub>1,4,4,4</sub> ][Tf <sub>2</sub> N] | 1.92           |
| 2 : 1                                                 | 0.93           | [bmpyrr][Tf <sub>2</sub> N]                | 2.10           |
| 1 : 1                                                 | 0.87           |                                            |                |
| 1 : 2                                                 | 0.85           | <i>n</i> -Butanol                          | 1.05           |
|                                                       |                | Cyclohexane                                | 0.56           |
| <sup>a</sup> Py $I_1/I_3$ at 293.15 K. (Present Work) |                |                                            |                |
| <sup>b</sup> ref 42                                   |                |                                            |                |

**Table S2.** Recovered Excited-State Intensity Decay Parameters for Pyrene (10  $\mu\text{M}$ ;  $\lambda_{\text{em}} = 373$  nm; excitation with a 340 nm nano-LED) Dissolved in the Investigated DESs at Different Temperatures in the Range  $293.15 \text{ K} \leq T \leq 363.15 \text{ K}$ . The Errors Associated with Decay Times ( $\tau/\text{ns}$ ) are  $\leq \pm 5\%$ .

| $T$ (K) | DES      | Thy : Men |       | DA : Men |       | Thy : DA |       |       |
|---------|----------|-----------|-------|----------|-------|----------|-------|-------|
|         |          | 1 : 1     | 1 : 2 | 1 : 1    | 1 : 2 | 2 : 1    | 1 : 1 | 1 : 2 |
| 293.15  | $\tau$   | 66.0      | 77.1  | 77.2     | 85.6  | 78.8     | 77.9  | 76.9  |
|         | $\chi^2$ | 1.24      | 1.20  | 1.33     | 1.02  | 1.14     | 1.23  | 1.30  |
| 303.15  | $\tau$   | 49.6      | 56.9  | 60.4     | 66.4  | 63.6     | 63.0  | 62.9  |
|         | $\chi^2$ | 1.38      | 1.10  | 1.42     | 1.31  | 1.25     | 1.28  | 1.27  |
| 313.15  | $\tau$   | 39.6      | 45.1  | 47.3     | 54.9  | 52.3     | 52.0  | 51.8  |
|         | $\chi^2$ | 1.29      | 1.22  | 1.16     | 1.07  | 1.17     | 1.23  | 1.34  |
| 323.15  | $\tau$   | 32.2      | 36.4  | 41.7     | 44.9  | 44.5     | 42.9  | 43.3  |
|         | $\chi^2$ | 1.59      | 1.53  | 1.42     | 1.30  | 1.23     | 1.26  | 1.45  |
| 333.15  | $\tau$   | 27.3      | 30.5  | 36.1     | 38.2  | 36.7     | 36.8  | 35.9  |
|         | $\chi^2$ | 1.46      | 1.31  | 1.29     | 1.10  | 1.21     | 1.37  | 1.35  |
| 343.15  | $\tau$   | 23.7      | 26.0  | 30.1     | 31.8  | 31.6     | 32.1  | 30.0  |
|         | $\chi^2$ | 1.74      | 1.64  | 1.14     | 1.35  | 1.38     | 1.57  | 1.52  |
| 353.15  | $\tau$   | 21.3      | 22.9  | 26.0     | 28.9  | 26.4     | 24.6  | 26.2  |
|         | $\chi^2$ | 1.57      | 1.52  | 1.18     | 1.10  | 1.29     | 1.54  | 1.53  |
| 363.15  | $\tau$   | 18.2      | 19.7  | 22.2     | 23.6  | 22.6     | 21.5  | 22.2  |
|         | $\chi^2$ | 1.40      | 1.54  | 1.11     | 1.25  | 1.26     | 1.49  | 1.61  |

**Table S3.** Recovered Excited-State Intensity Decay Parameters for Pyrene (10  $\mu\text{M}$ ;  $\lambda_{\text{em}} = 373$  nm; excitation with a 340 nm nano-LED) Dissolved in the DES [**Thy : Men (1 : 1)**] at Varying Nitromethane Concentrations at Different Temperatures in the Range  $293.15 \text{ K} \leq T \leq 363.15$  K. The Errors Associated with Decay Times ( $\tau/\text{ns}$ ) and Pre-Exponential Factor ( $\alpha$ ) are  $\leq \pm 5\%$ .

| $T$ (K) |                            | $[\text{CH}_3\text{NO}_2]/\text{M}$ |                |                |                |                |
|---------|----------------------------|-------------------------------------|----------------|----------------|----------------|----------------|
|         |                            | 293.15                              | 313.15         | 333.15         | 353.15         | 363.15         |
| 0.000   | $\tau_0$<br>( $\alpha_1$ ) | 66.0<br>(1.00)                      | 39.6<br>(1.00) | 27.3<br>(1.00) | 21.3<br>(1.00) | 18.2<br>(1.00) |
|         | $\chi^2$                   | 1.24                                | 1.29           | 1.46           | 1.57           | 1.40           |
|         |                            |                                     |                |                |                |                |
| 0.005   | $\tau_1$<br>( $\alpha_1$ ) | –                                   | 0.25<br>(0.02) | 0.16<br>(0.04) | 0.28<br>(0.03) | 0.17<br>(0.04) |
|         | $\tau_2$<br>( $\alpha_2$ ) | 44.2<br>(1.00)                      | 17.8<br>(0.98) | 13.0<br>(0.96) | 11.0<br>(0.97) | 9.81<br>(0.96) |
|         | $\chi^2$                   | 1.18                                | 1.37           | 1.26           | 1.16           | 1.15           |
| 0.009   | $\tau_1$<br>( $\alpha_1$ ) | –                                   | 0.31<br>(0.03) | 0.56<br>(0.04) | 0.08<br>(0.17) | 0.01<br>(1.00) |
|         | $\tau_2$<br>( $\alpha_2$ ) | 30.4<br>(1.00)                      | 12.6<br>(0.97) | 8.96<br>(0.96) | 6.90<br>(0.83) | 6.20<br>(0.00) |
|         | $\chi^2$                   | 1.19                                | 1.28           | 1.27           | 0.97           | 1.13           |
| 0.014   | $\tau_1$<br>( $\alpha_1$ ) | 0.42<br>(0.02)                      | 0.36<br>(0.05) | 0.14<br>(0.11) | 0.01<br>(1.00) | 0.01<br>(1.00) |
|         | $\tau_2$<br>( $\alpha_2$ ) | 23.4<br>(0.98)                      | 9.93<br>(0.95) | 6.59<br>(0.89) | 5.10<br>(0.00) | 4.53<br>(0.00) |
|         | $\chi^2$                   | 1.43                                | 1.15           | 1.13           | 1.32           | 1.00           |
| 0.019   | $\tau_1$<br>( $\alpha_1$ ) | 0.56<br>(0.03)                      | 0.34<br>(0.06) | 0.14<br>(0.13) | 0.01<br>(1.00) | 0.01<br>(1.00) |
|         | $\tau_2$<br>( $\alpha_2$ ) | 19.3<br>(0.97)                      | 8.20<br>(0.94) | 5.30<br>(0.87) | 4.07<br>(0.00) | 3.66<br>(0.00) |
|         | $\chi^2$                   | 1.39                                | 1.25           | 0.96           | 1.03           | 1.05           |
| 0.023   | $\tau_1$<br>( $\alpha_1$ ) | 1.44<br>(0.04)                      | 0.15<br>(0.12) | 0.14<br>(0.15) | 0.01<br>(1.00) | 0.24<br>(1.00) |
|         | $\tau_2$<br>( $\alpha_2$ ) | 16.3<br>(0.96)                      | 6.52<br>(0.88) | 4.49<br>(0.85) | 3.42<br>(0.00) | 3.12<br>(0.00) |
|         | $\chi^2$                   | 1.40                                | 1.02           | 0.93           | 0.93           | 0.84           |
| 0.028   | $\tau_1$<br>( $\alpha_1$ ) | 0.52<br>(0.04)                      | 0.15<br>(0.15) | 0.37<br>(0.17) | 0.01<br>(1.00) | 0.01<br>(0.16) |
|         | $\tau_2$<br>( $\alpha_2$ ) | 13.7<br>(0.96)                      | 5.57<br>(0.85) | 3.91<br>(0.83) | 2.97<br>(0.00) | 2.67<br>(0.84) |
|         | $\chi^2$                   | 1.26                                | 1.07           | 0.89           | 1.06           | 0.94           |

|              |                          |                |                |                |                |                |
|--------------|--------------------------|----------------|----------------|----------------|----------------|----------------|
| <b>0.033</b> | $\tau_1$<br>$(\alpha_1)$ | 0.69<br>(0.06) | 0.14<br>(0.16) | 0.11<br>(1.00) | 0.01<br>(1.00) | 0.01<br>(1.00) |
|              | $\tau_2$<br>$(\alpha_2)$ | 12.3<br>(0.94) | 5.03<br>(0.84) | 3.34<br>(0.00) | 0.00<br>(1.00) | 2.25<br>(0.00) |
|              | $\chi^2$                 | 1.25           | 1.03           | 0.96           | 1.17           | 1.12           |
| <b>0.037</b> | $\tau_1$<br>$(\alpha_1)$ | 0.90<br>(0.07) | 0.11<br>(0.24) | 0.10<br>(0.31) | 0.01<br>(1.00) | 0.25<br>(0.22) |
|              | $\tau_2$<br>$(\alpha_2)$ | 11.4<br>(0.93) | 4.49<br>(0.76) | 3.05<br>(0.69) | 2.27<br>(0.00) | 2.07<br>(0.78) |
|              | $\chi^2$                 | 1.20           | 1.09           | 1.09           | 1.04           | 1.07           |
| <b>0.042</b> | $\tau_1$<br>$(\alpha_1)$ | 0.53<br>(0.07) | 0.14<br>(0.28) | 0.14<br>(1.00) | 0.01<br>(1.00) | 0.01<br>(1.00) |
|              | $\tau_2$<br>$(\alpha_2)$ | 9.93<br>(0.93) | 4.14<br>(0.72) | 2.82<br>(0.00) | 2.04<br>(0.00) | 1.84<br>(0.00) |
|              | $\chi^2$                 | 1.13           | 1.07           | 1.08           | 0.95           | 1.52           |

**Table S4.** Recovered Excited-State Intensity Decay Parameters for Pyrene (10  $\mu\text{M}$ ;  $\lambda_{\text{em}} = 373$  nm; excitation with a 340 nm nano-LED) Dissolved in the DES [**Thy : Men (1 : 2)**] at Varying Nitromethane Concentrations at Different Temperatures in the Range  $293.15 \text{ K} \leq T \leq 363.15$  K. The Errors Associated with Decay Times ( $\tau/\text{ns}$ ) and Pre-Exponential Factor ( $\alpha$ ) are  $\leq \pm 5\%$ .

| $T$ (K) |                            | $[\text{CH}_3\text{NO}_2]/\text{M}$ |                |                |                |                |
|---------|----------------------------|-------------------------------------|----------------|----------------|----------------|----------------|
|         |                            | 293.15                              | 313.15         | 333.15         | 353.15         | 363.15         |
| 0.000   | $\tau_0$<br>( $\alpha_1$ ) | 77.1<br>(1.00)                      | 45.1<br>(1.00) | 30.5<br>(1.00) | 22.9<br>(1.00) | 19.7<br>(1.00) |
|         | $\chi^2$                   | 1.20                                | 1.22           | 1.31           | 1.52           | 1.54           |
|         |                            |                                     |                |                |                |                |
| 0.005   | $\tau_1$<br>( $\alpha_1$ ) | 0.23<br>(0.01)                      | 0.14<br>(0.01) | 0.20<br>(0.03) | 0.25<br>(0.03) | 0.52<br>(0.02) |
|         | $\tau_2$<br>( $\alpha_2$ ) | 49.5<br>(0.99)                      | 25.9<br>(0.99) | 16.0<br>(0.97) | 11.8<br>(0.97) | 10.7<br>(0.98) |
|         | $\chi^2$                   | 1.10                                | 1.20           | 1.34           | 1.21           | 1.18           |
| 0.009   | $\tau_1$<br>( $\alpha_1$ ) | 0.49<br>(0.01)                      | 0.12<br>(0.01) | 0.68<br>(0.04) | 0.19<br>(0.06) | 0.36<br>(0.04) |
|         | $\tau_2$<br>( $\alpha_2$ ) | 36.1<br>(0.99)                      | 18.0<br>(0.99) | 11.2<br>(0.96) | 7.97<br>(0.94) | 7.05<br>(0.96) |
|         | $\chi^2$                   | 1.20                                | 1.14           | 1.30           | 1.13           | 1.15           |
| 0.014   | $\tau_1$<br>( $\alpha_1$ ) | 0.68<br>(0.01)                      | 0.18<br>(0.03) | 0.37<br>(0.05) | 0.21<br>(0.10) | 0.23<br>(0.07) |
|         | $\tau_2$<br>( $\alpha_2$ ) | 28.3<br>(0.99)                      | 14.0<br>(0.97) | 8.27<br>(0.95) | 5.87<br>(0.90) | 5.02<br>(0.93) |
|         | $\chi^2$                   | 1.11                                | 1.24           | 1.20           | 0.96           | 1.19           |
| 0.019   | $\tau_1$<br>( $\alpha_1$ ) | 1.10<br>(0.02)                      | 0.15<br>(0.08) | 0.49<br>(0.06) | 0.16<br>(0.14) | 0.20<br>(0.11) |
|         | $\tau_2$<br>( $\alpha_2$ ) | 23.6<br>(0.98)                      | 11.4<br>(0.92) | 6.57<br>(0.94) | 4.62<br>(0.86) | 4.02<br>(0.89) |
|         | $\chi^2$                   | 1.11                                | 1.17           | 1.21           | 1.06           | 0.97           |
| 0.023   | $\tau_1$<br>( $\alpha_1$ ) | 0.77<br>(0.02)                      | 0.62<br>(0.05) | 0.17<br>(0.12) | 0.13<br>(0.17) | 0.18<br>(0.15) |
|         | $\tau_2$<br>( $\alpha_2$ ) | 20.2<br>(0.98)                      | 9.86<br>(0.95) | 5.36<br>(0.88) | 3.82<br>(0.83) | 3.35<br>(0.85) |
|         | $\chi^2$                   | 1.14                                | 1.27           | 0.88           | 0.92           | 1.13           |
| 0.028   | $\tau_1$<br>( $\alpha_1$ ) | 0.95<br>(0.03)                      | 0.25<br>(0.07) | 0.32<br>(0.10) | 0.21<br>(0.12) | 0.15<br>(0.20) |
|         | $\tau_2$<br>( $\alpha_2$ ) | 17.8<br>(0.97)                      | 8.23<br>(0.93) | 4.66<br>(0.90) | 3.28<br>(0.88) | 2.93<br>(0.80) |
|         | $\chi^2$                   | 1.12                                | 1.14           | 0.86           | 1.19           | 1.14           |

|              |                                            |                |                |                |                |                |
|--------------|--------------------------------------------|----------------|----------------|----------------|----------------|----------------|
| <b>0.033</b> | $\tau_1$<br><b>(<math>\alpha_1</math>)</b> | 0.41<br>(0.04) | 0.22<br>(0.09) | 0.26<br>(0.12) | 0.15<br>(0.17) | 0.12<br>(0.26) |
|              | $\tau_2$<br><b>(<math>\alpha_2</math>)</b> | 15.5<br>(0.96) | 7.24<br>(0.91) | 4.14<br>(0.88) | 2.90<br>(0.83) | 2.55<br>(0.74) |
|              | $\chi^2$                                   | 1.22           | 0.99           | 0.98           | 1.13           | 1.32           |
| <b>0.037</b> | $\tau_1$<br><b>(<math>\alpha_1</math>)</b> | 1.00<br>(0.05) | 0.27<br>(0.12) | 0.15<br>(0.13) | 0.22<br>(0.22) | 0.10<br>(0.30) |
|              | $\tau_2$<br><b>(<math>\alpha_2</math>)</b> | 14.1<br>(0.95) | 6.51<br>(0.88) | 3.67<br>(0.87) | 2.62<br>(0.78) | 2.25<br>(0.70) |
|              | $\chi^2$                                   | 1.13           | 1.12           | 1.12           | 0.93           | 1.01           |
| <b>0.042</b> | $\tau_1$<br><b>(<math>\alpha_1</math>)</b> | 0.85<br>(0.05) | 0.32<br>(0.15) | 0.25<br>(0.13) | 0.12<br>(0.30) | 0.32<br>(0.36) |
|              | $\tau_2$<br><b>(<math>\alpha_2</math>)</b> | 12.6<br>(0.95) | 5.75<br>(0.85) | 3.27<br>(0.87) | 2.36<br>(0.70) | 2.02<br>(0.64) |
|              | $\chi^2$                                   | 1.35           | 0.97           | 1.04           | 1.09           | 1.02           |



**Table S5.** Recovered Excited-State Intensity Decay Parameters for Pyrene (10  $\mu\text{M}$ ;  $\lambda_{\text{em}} = 373$  nm; excitation with a 340 nm nano-LED) Dissolved in the DES [DA : Men (1 : 1)] at Varying Nitromethane Concentrations at Different Temperatures in the Range  $293.15 \text{ K} \leq T \leq 363.15$  K. The Errors Associated with Decay Times ( $\tau/\text{ns}$ ) and Pre-Exponential Factor ( $\alpha$ ) are  $\leq \pm 5\%$ .

| $T$ (K) |                            | $[\text{CH}_3\text{NO}_2]/\text{M}$ |                |                |                |                |
|---------|----------------------------|-------------------------------------|----------------|----------------|----------------|----------------|
|         |                            | 293.15                              | 313.15         | 333.15         | 353.15         | 363.15         |
| 0.000   | $\tau_0$<br>( $\alpha_1$ ) | 77.2<br>(1.00)                      | 47.3<br>(1.00) | 36.1<br>(1.00) | 26.0<br>(1.00) | 22.2<br>(1.00) |
|         | $\chi^2$                   | 1.33                                | 1.16           | 1.29           | 1.18           | 1.11           |
|         |                            |                                     |                |                |                |                |
| 0.005   | $\tau_1$<br>( $\alpha_1$ ) | 0.79<br>(0.06)                      | 1.51<br>(0.05) | 0.40<br>(0.09) | 0.48<br>(0.08) | 0.38<br>(0.09) |
|         | $\tau_2$<br>( $\alpha_2$ ) | 44.0<br>(0.94)                      | 27.4<br>(0.95) | 21.4<br>(0.91) | 15.1<br>(0.92) | 11.1<br>(0.91) |
|         | $\chi^2$                   | 1.16                                | 1.21           | 1.00           | 1.12           | 1.05           |
| 0.009   | $\tau_1$<br>( $\alpha_1$ ) | 0.80<br>(0.08)                      | 0.91<br>(0.06) | 0.35<br>(0.12) | 0.31<br>(0.11) | 0.32<br>(0.13) |
|         | $\tau_2$<br>( $\alpha_2$ ) | 31.0<br>(0.92)                      | 18.6<br>(0.94) | 14.8<br>(0.88) | 9.84<br>(0.89) | 7.11<br>(0.87) |
|         | $\chi^2$                   | 1.17                                | 1.17           | 1.05           | 1.20           | 1.15           |
| 0.014   | $\tau_1$<br>( $\alpha_1$ ) | 0.78<br>(0.10)                      | 0.82<br>(0.07) | 0.41<br>(0.14) | 0.40<br>(0.14) | 0.31<br>(0.15) |
|         | $\tau_2$<br>( $\alpha_2$ ) | 24.1<br>(0.90)                      | 14.5<br>(0.93) | 11.6<br>(0.86) | 7.54<br>(0.86) | 5.50<br>(0.85) |
|         | $\chi^2$                   | 1.26                                | 1.07           | 1.01           | 1.24           | 1.03           |
| 0.019   | $\tau_1$<br>( $\alpha_1$ ) | 0.70<br>(0.12)                      | 1.12<br>(0.10) | 0.34<br>(0.18) | 0.30<br>(0.18) | 0.34<br>(0.18) |
|         | $\tau_2$<br>( $\alpha_2$ ) | 19.4<br>(0.88)                      | 11.7<br>(0.90) | 9.31<br>(0.82) | 5.98<br>(0.82) | 4.68<br>(0.82) |
|         | $\chi^2$                   | 1.18                                | 1.11           | 1.03           | 1.06           | 1.10           |
| 0.023   | $\tau_1$<br>( $\alpha_1$ ) | 0.60<br>(0.14)                      | 0.89<br>(0.11) | 0.35<br>(0.19) | 0.34<br>(0.20) | 0.28<br>(0.22) |
|         | $\tau_2$<br>( $\alpha_2$ ) | 16.2<br>(0.86)                      | 9.94<br>(0.89) | 7.65<br>(0.81) | 5.11<br>(0.80) | 4.00<br>(0.78) |
|         | $\chi^2$                   | 1.29                                | 1.16           | 1.11           | 0.92           | 1.00           |
| 0.028   | $\tau_1$<br>( $\alpha_1$ ) | 0.74<br>(0.16)                      | 0.93<br>(0.12) | 0.40<br>(0.23) | 0.37<br>(0.22) | 0.37<br>(0.21) |
|         | $\tau_2$<br>( $\alpha_2$ ) | 14.0<br>(0.84)                      | 8.82<br>(0.88) | 6.32<br>(0.77) | 4.39<br>(0.78) | 3.58<br>(0.79) |
|         | $\chi^2$                   | 1.15                                | 1.21           | 1.10           | 0.94           | 1.00           |

|              |                                            |                |                |                |                |                |
|--------------|--------------------------------------------|----------------|----------------|----------------|----------------|----------------|
| <b>0.033</b> | $\tau_1$<br><b>(<math>\alpha_1</math>)</b> | 0.65<br>(0.18) | 0.67<br>(0.13) | 0.31<br>(0.25) | 0.30<br>(0.24) | 0.27<br>(0.24) |
|              | $\tau_2$<br><b>(<math>\alpha_2</math>)</b> | 12.0<br>(0.82) | 7.62<br>(0.87) | 5.59<br>(0.75) | 3.79<br>(0.76) | 3.18<br>(0.76) |
|              | $\chi^2$                                   | 1.17           | 1.14           | 0.95           | 1.10           | 1.02           |
| <b>0.037</b> | $\tau_1$<br><b>(<math>\alpha_1</math>)</b> | 0.64<br>(0.19) | 0.56<br>(0.14) | 0.36<br>(0.26) | 0.32<br>(0.27) | 0.22<br>(0.28) |
|              | $\tau_2$<br><b>(<math>\alpha_2</math>)</b> | 10.9<br>(0.81) | 6.82<br>(0.86) | 4.86<br>(0.74) | 3.42<br>(0.73) | 2.84<br>(0.72) |
|              | $\chi^2$                                   | 1.10           | 1.10           | 1.13           | 0.86           | 1.01           |
| <b>0.042</b> | $\tau_1$<br><b>(<math>\alpha_1</math>)</b> | 0.55<br>(0.21) | 0.86<br>(0.16) | 0.30<br>(0.29) | 0.25<br>(0.29) | 0.21<br>(0.29) |
|              | $\tau_2$<br><b>(<math>\alpha_2</math>)</b> | 9.52<br>(0.79) | 6.22<br>(0.84) | 4.40<br>(0.71) | 3.08<br>(0.71) | 2.58<br>(0.71) |
|              | $\chi^2$                                   | 1.11           | 1.09           | 1.04           | 1.05           | 1.16           |

**Table S6.** Recovered Excited-State Intensity Decay Parameters for Pyrene (10  $\mu\text{M}$ ;  $\lambda_{\text{em}} = 373$  nm; excitation with a 340 nm nano-LED) Dissolved in the DES [DA : Men (1 : 2)] at Varying Nitromethane Concentrations at Different Temperatures in the Range  $293.15 \text{ K} \leq T \leq 363.15$  K. The Errors Associated with Decay Times ( $\tau/\text{ns}$ ) and Pre-Exponential Factor ( $\alpha$ ) are  $\leq \pm 5\%$ .

| $T$ (K) |                            | $[\text{CH}_3\text{NO}_2]/\text{M}$ |                |                |                |                |
|---------|----------------------------|-------------------------------------|----------------|----------------|----------------|----------------|
|         |                            | 293.15                              | 313.15         | 333.15         | 353.15         | 363.15         |
| 0.000   | $\tau_0$<br>( $\alpha_1$ ) | 85.6<br>(1.00)                      | 54.9<br>(1.00) | 38.2<br>(1.00) | 28.9<br>(1.00) | 23.6<br>(1.00) |
|         | $\chi^2$                   | 1.02                                | 1.07           | 1.10           | 1.10           | 1.25           |
|         |                            |                                     |                |                |                |                |
| 0.005   | $\tau_1$<br>( $\alpha_1$ ) | 0.86<br>(0.05)                      | 0.63<br>(0.05) | 0.43<br>(0.05) | 0.45<br>(0.07) | 0.44<br>(0.08) |
|         | $\tau_2$<br>( $\alpha_2$ ) | 53.1<br>(0.95)                      | 29.8<br>(0.95) | 19.5<br>(0.95) | 15.4<br>(0.93) | 11.9<br>(0.92) |
|         | $\chi^2$                   | 1.17                                | 1.23           | 1.23           | 1.21           | 1.29           |
| 0.009   | $\tau_1$<br>( $\alpha_1$ ) | 0.83<br>(0.07)                      | 0.59<br>(0.08) | 0.56<br>(0.09) | 0.41<br>(0.11) | 0.35<br>(0.12) |
|         | $\tau_2$<br>( $\alpha_2$ ) | 35.7<br>(0.93)                      | 20.3<br>(0.92) | 12.5<br>(0.91) | 10.0<br>(0.89) | 8.07<br>(0.88) |
|         | $\chi^2$                   | 1.15                                | 1.28           | 1.10           | 1.28           | 1.09           |
| 0.014   | $\tau_1$<br>( $\alpha_1$ ) | 0.80<br>(0.09)                      | 0.54<br>(0.10) | 0.48<br>(0.11) | 0.42<br>(0.12) | 0.30<br>(0.15) |
|         | $\tau_2$<br>( $\alpha_2$ ) | 27.7<br>(0.91)                      | 15.2<br>(0.90) | 9.72<br>(0.89) | 7.42<br>(0.88) | 6.05<br>(0.85) |
|         | $\chi^2$                   | 1.03                                | 1.26           | 1.17           | 1.13           | 1.12           |
| 0.019   | $\tau_1$<br>( $\alpha_1$ ) | 0.70<br>(0.10)                      | 0.55<br>(0.13) | 0.52<br>(0.14) | 0.46<br>(0.16) | 0.31<br>(0.18) |
|         | $\tau_2$<br>( $\alpha_2$ ) | 22.4<br>(0.90)                      | 12.0<br>(0.87) | 7.73<br>(0.86) | 6.03<br>(0.84) | 4.86<br>(0.82) |
|         | $\chi^2$                   | 1.21                                | 1.21           | 1.16           | 1.08           | 1.00           |
| 0.023   | $\tau_1$<br>( $\alpha_1$ ) | 0.70<br>(0.12)                      | 0.56<br>(0.15) | 0.49<br>(0.16) | 0.37<br>(0.18) | 0.31<br>(0.19) |
|         | $\tau_2$<br>( $\alpha_2$ ) | 19.1<br>(0.88)                      | 10.2<br>(0.85) | 6.53<br>(0.84) | 4.96<br>(0.82) | 4.07<br>(0.81) |
|         | $\chi^2$                   | 1.26                                | 1.20           | 1.15           | 1.04           | 1.10           |
| 0.028   | $\tau_1$<br>( $\alpha_1$ ) | 0.67<br>(0.13)                      | 0.52<br>(0.17) | 0.49<br>(0.17) | 0.33<br>(0.19) | 0.32<br>(0.21) |
|         | $\tau_2$<br>( $\alpha_2$ ) | 16.4<br>(0.87)                      | 8.50<br>(0.83) | 5.69<br>(0.83) | 4.18<br>(0.81) | 3.47<br>(0.79) |
|         | $\chi^2$                   | 1.02                                | 1.23           | 0.89           | 1.01           | 1.13           |

|              |                                            |                |                |                |                |                |
|--------------|--------------------------------------------|----------------|----------------|----------------|----------------|----------------|
| <b>0.033</b> | $\tau_1$<br><b>(<math>\alpha_1</math>)</b> | 0.66<br>(0.15) | 0.37<br>(0.19) | 0.42<br>(0.18) | 0.30<br>(0.22) | 0.27<br>(0.23) |
|              | $\tau_2$<br><b>(<math>\alpha_2</math>)</b> | 14.3<br>(0.85) | 7.31<br>(0.81) | 4.87<br>(0.82) | 3.68<br>(0.78) | 2.98<br>(0.77) |
|              | $\chi^2$                                   | 1.20           | 1.06           | 1.10           | 1.01           | 1.10           |
| <b>0.037</b> | $\tau_1$<br><b>(<math>\alpha_1</math>)</b> | 0.64<br>(0.17) | 0.44<br>(0.20) | 0.36<br>(0.21) | 0.30<br>(0.24) | 0.26<br>(0.29) |
|              | $\tau_2$<br><b>(<math>\alpha_2</math>)</b> | 12.6<br>(0.83) | 6.46<br>(0.80) | 4.34<br>(0.79) | 3.27<br>(0.76) | 2.78<br>(0.71) |
|              | $\chi^2$                                   | 1.25           | 1.21           | 1.04           | 0.82           | 1.04           |
| <b>0.042</b> | $\tau_1$<br><b>(<math>\alpha_1</math>)</b> | 0.60<br>(0.19) | 0.42<br>(0.21) | 0.36<br>(0.22) | 0.40<br>(0.25) | 0.27<br>(0.30) |
|              | $\tau_2$<br><b>(<math>\alpha_2</math>)</b> | 11.1<br>(0.81) | 5.78<br>(0.79) | 3.88<br>(0.78) | 2.95<br>(0.75) | 2.58<br>(0.70) |
|              | $\chi^2$                                   | 1.20           | 1.07           | 0.93           | 1.03           | 1.02           |

**Table S7.** Recovered Excited-State Intensity Decay Parameters for Pyrene (10  $\mu\text{M}$ ;  $\lambda_{\text{em}} = 373$  nm; excitation with a 340 nm nano-LED) Dissolved in the DES [Thy : DA (2 : 1)] at Varying Nitromethane Concentrations at Different Temperatures in the Range  $293.15 \text{ K} \leq T \leq 363.15$  K. The Errors Associated with Decay Times ( $\tau/\text{ns}$ ) and Pre-Exponential Factor ( $\alpha$ ) are  $\leq \pm 5\%$ .

| $T$ (K) |                            | $[\text{CH}_3\text{NO}_2]/\text{M}$ |                |                |                |                |
|---------|----------------------------|-------------------------------------|----------------|----------------|----------------|----------------|
|         |                            | 293.15                              | 313.15         | 333.15         | 353.15         | 363.15         |
| 0.000   | $\tau_0$<br>( $\alpha_1$ ) | 78.8<br>(1.00)                      | 52.3<br>(1.00) | 36.7<br>(1.00) | 26.4<br>(1.00) | 22.6<br>(1.00) |
|         | $\chi^2$                   | 1.14                                | 1.17           | 1.21           | 1.29           | 1.26           |
|         |                            |                                     |                |                |                |                |
| 0.005   | $\tau_1$<br>( $\alpha_1$ ) | 0.37<br>(0.02)                      | 0.32<br>(0.02) | 0.34<br>(0.03) | 0.21<br>(0.04) | 0.01<br>(1.00) |
|         | $\tau_2$<br>( $\alpha_2$ ) | 38.1<br>(0.98)                      | 22.4<br>(0.98) | 14.7<br>(0.97) | 10.9<br>(0.96) | 7.92<br>(0.00) |
|         | $\chi^2$                   | 1.05                                | 1.29           | 1.20           | 1.19           | 1.14           |
| 0.009   | $\tau_1$<br>( $\alpha_1$ ) | 0.26<br>(0.03)                      | 0.45<br>(0.03) | 0.28<br>(0.05) | 0.31<br>(0.06) | 0.01<br>(1.00) |
|         | $\tau_2$<br>( $\alpha_2$ ) | 25.7<br>(0.97)                      | 14.4<br>(0.97) | 9.26<br>(0.95) | 6.07<br>(0.94) | 5.02<br>(0.00) |
|         | $\chi^2$                   | 1.11                                | 1.12           | 1.07           | 1.11           | 1.03           |
| 0.014   | $\tau_1$<br>( $\alpha_1$ ) | 0.54<br>(0.03)                      | 0.42<br>(0.04) | 0.13<br>(1.00) | 0.28<br>(0.09) | 0.01<br>(1.00) |
|         | $\tau_2$<br>( $\alpha_2$ ) | 19.9<br>(0.97)                      | 10.8<br>(0.96) | 6.93<br>(0.00) | 4.38<br>(0.91) | 3.79<br>(0.00) |
|         | $\chi^2$                   | 1.24                                | 1.22           | 1.09           | 0.97           | 0.91           |
| 0.019   | $\tau_1$<br>( $\alpha_1$ ) | 0.42<br>(0.04)                      | 0.46<br>(0.05) | 0.01<br>(1.00) | 0.38<br>(0.12) | 0.26<br>(0.16) |
|         | $\tau_2$<br>( $\alpha_2$ ) | 15.9<br>(0.96)                      | 8.65<br>(0.95) | 5.35<br>(0.00) | 3.58<br>(0.88) | 3.03<br>(0.84) |
|         | $\chi^2$                   | 1.16                                | 1.29           | 1.03           | 1.15           | 0.94           |
| 0.023   | $\tau_1$<br>( $\alpha_1$ ) | 0.43<br>(0.06)                      | 0.25<br>(0.09) | 0.01<br>(1.00) | 0.27<br>(0.16) | 0.01<br>(1.00) |
|         | $\tau_2$<br>( $\alpha_2$ ) | 13.0<br>(0.94)                      | 7.14<br>(0.91) | 4.40<br>(0.00) | 2.88<br>(0.84) | 2.53<br>(0.00) |
|         | $\chi^2$                   | 1.16                                | 1.07           | 1.07           | 1.26           | 1.14           |
| 0.028   | $\tau_1$<br>( $\alpha_1$ ) | 0.42<br>(0.08)                      | 0.31<br>(0.09) | 0.02<br>(1.00) | 0.30<br>(0.20) | 0.01<br>(1.00) |
|         | $\tau_2$<br>( $\alpha_2$ ) | 10.8<br>(0.92)                      | 6.04<br>(0.91) | 3.90<br>(0.00) | 2.36<br>(0.80) | 2.24<br>(0.00) |
|         | $\chi^2$                   | 1.26                                | 1.01           | 0.89           | 1.08           | 1.14           |

|              |                                            |                |                |                |                |                |
|--------------|--------------------------------------------|----------------|----------------|----------------|----------------|----------------|
| <b>0.033</b> | $\tau_1$<br><b>(<math>\alpha_1</math>)</b> | 0.37<br>(0.10) | 0.20<br>(0.14) | 0.13<br>(0.26) | 0.21<br>(0.24) | 0.21<br>(0.29) |
|              | $\tau_2$<br><b>(<math>\alpha_2</math>)</b> | 9.53<br>(0.90) | 5.29<br>(0.86) | 3.36<br>(0.74) | 2.07<br>(0.76) | 1.97<br>(0.71) |
|              | $\chi^2$                                   | 1.08           | 1.00           | 1.26           | 1.06           | 1.09           |
| <b>0.037</b> | $\tau_1$<br><b>(<math>\alpha_1</math>)</b> | 0.19<br>(0.15) | 0.24<br>(0.14) | 0.08<br>(0.30) | 0.35<br>(0.30) | 0.01<br>(1.00) |
|              | $\tau_2$<br><b>(<math>\alpha_2</math>)</b> | 8.23<br>(0.85) | 4.63<br>(0.86) | 2.99<br>(0.70) | 1.89<br>(0.70) | 1.65<br>(0.00) |
|              | $\chi^2$                                   | 1.27           | 1.08           | 1.15           | 1.15           | 1.04           |
| <b>0.042</b> | $\tau_1$<br><b>(<math>\alpha_1</math>)</b> | 0.30<br>(0.15) | 0.19<br>(0.20) | 0.01<br>(1.00) | 0.20<br>(0.33) | 0.17<br>(0.33) |
|              | $\tau_2$<br><b>(<math>\alpha_2</math>)</b> | 7.32<br>(0.85) | 4.27<br>(0.80) | 2.73<br>(0.00) | 1.73<br>(0.67) | 1.57<br>(0.67) |
|              | $\chi^2$                                   | 1.04           | 1.19           | 1.26           | 1.09           | 1.06           |

**Table S8.** Recovered Excited-State Intensity Decay Parameters for Pyrene (10  $\mu$ M;  $\lambda_{em} = 373$  nm; excitation with a 340 nm nano-LED) Dissolved in the DES [Thy : DA (1 : 1)] at Varying Nitromethane Concentrations at Different Temperatures in the Range  $293.15 \text{ K} \leq T \leq 363.15$  K. The Errors Associated with Decay Times ( $\tau$ /ns) and Pre-Exponential Factor ( $\alpha$ ) are  $\leq \pm 5\%$ .

| $T$ (K) |                            | $[\text{CH}_3\text{NO}_2]/\text{M}$ |                |                |                |                |
|---------|----------------------------|-------------------------------------|----------------|----------------|----------------|----------------|
|         |                            | 293.15                              | 313.15         | 333.15         | 353.15         | 363.15         |
| 0.000   | $\tau_0$<br>( $\alpha_1$ ) | 77.9<br>(1.00)                      | 52.0<br>(1.00) | 36.8<br>(1.00) | 24.6<br>(1.00) | 21.5<br>(1.00) |
|         | $\chi^2$                   | 1.23                                | 1.23           | 1.37           | 1.54           | 1.49           |
|         |                            |                                     |                |                |                |                |
| 0.005   | $\tau_1$<br>( $\alpha_1$ ) | 0.24<br>(0.02)                      | 0.22<br>(0.02) | 0.08<br>(0.04) | 0.06<br>(0.28) | 0.01<br>(1.00) |
|         | $\tau_2$<br>( $\alpha_2$ ) | 42.5<br>(0.98)                      | 24.8<br>(0.98) | 18.0<br>(0.96) | 11.4<br>(0.72) | 7.74<br>(0.00) |
|         | $\chi^2$                   | 1.17                                | 1.12           | 1.32           | 1.10           | 1.27           |
| 0.009   | $\tau_1$<br>( $\alpha_1$ ) | 0.32<br>(0.03)                      | 0.37<br>(0.04) | 0.26<br>(0.06) | 0.07<br>(0.31) | 0.04<br>(0.80) |
|         | $\tau_2$<br>( $\alpha_2$ ) | 27.1<br>(0.97)                      | 16.0<br>(0.96) | 11.0<br>(0.94) | 7.02<br>(0.69) | 5.22<br>(0.20) |
|         | $\chi^2$                   | 1.17                                | 1.06           | 1.18           | 1.21           | 1.04           |
| 0.014   | $\tau_1$<br>( $\alpha_1$ ) | 0.46<br>(0.04)                      | 0.23<br>(0.06) | 0.33<br>(0.08) | 0.05<br>(0.61) | 0.01<br>(1.00) |
|         | $\tau_2$<br>( $\alpha_2$ ) | 22.4<br>(0.96)                      | 11.7<br>(0.94) | 8.06<br>(0.92) | 5.22<br>(0.39) | 4.01<br>(0.00) |
|         | $\chi^2$                   | 1.12                                | 1.02           | 1.30           | 1.04           | 0.79           |
| 0.019   | $\tau_1$<br>( $\alpha_1$ ) | 0.26<br>(0.06)                      | 0.41<br>(0.07) | 0.10<br>(0.24) | 0.01<br>(1.00) | 0.02<br>(1.00) |
|         | $\tau_2$<br>( $\alpha_2$ ) | 18.2<br>(0.94)                      | 9.22<br>(0.93) | 6.29<br>(0.76) | 4.14<br>(0.00) | 3.24<br>(0.00) |
|         | $\chi^2$                   | 1.13                                | 1.17           | 1.11           | 0.99           | 1.07           |
| 0.023   | $\tau_1$<br>( $\alpha_1$ ) | 0.31<br>(0.07)                      | 0.20<br>(0.10) | 0.11<br>(0.23) | 0.01<br>(1.00) | 0.01<br>(1.00) |
|         | $\tau_2$<br>( $\alpha_2$ ) | 15.3<br>(0.93)                      | 7.59<br>(0.90) | 5.10<br>(0.77) | 3.47<br>(0.00) | 2.78<br>(0.00) |
|         | $\chi^2$                   | 1.19                                | 1.15           | 1.11           | 1.05           | 0.89           |
| 0.028   | $\tau_1$<br>( $\alpha_1$ ) | 0.24<br>(0.08)                      | 0.21<br>(0.13) | 0.12<br>(0.28) | 0.01<br>(1.00) | 0.01<br>(1.00) |
|         | $\tau_2$<br>( $\alpha_2$ ) | 12.9<br>(0.92)                      | 6.48<br>(0.87) | 4.36<br>(0.72) | 2.98<br>(0.00) | 2.35<br>(0.00) |
|         | $\chi^2$                   | 1.24                                | 1.19           | 1.21           | 1.08           | 1.17           |

|              |                          |                |                |                |                |                |
|--------------|--------------------------|----------------|----------------|----------------|----------------|----------------|
| <b>0.033</b> | $\tau_1$<br>$(\alpha_1)$ | 0.26<br>(0.09) | 0.20<br>(0.14) | 0.12<br>(0.31) | 0.01<br>(1.00) | 0.01<br>(1.00) |
|              | $\tau_2$<br>$(\alpha_2)$ | 11.6<br>(0.91) | 5.50<br>(0.86) | 3.84<br>(0.69) | 2.54<br>(0.00) | 2.13<br>(0.00) |
|              | $\chi^2$                 | 1.24           | 1.18           | 1.02           | 1.13           | 1.24           |
| <b>0.037</b> | $\tau_1$<br>$(\alpha_1)$ | 0.25<br>(0.11) | 0.17<br>(0.21) | 0.20<br>(0.24) | 0.05<br>(0.83) | 0.01<br>(1.00) |
|              | $\tau_2$<br>$(\alpha_2)$ | 10.1<br>(0.89) | 4.88<br>(0.79) | 3.34<br>(0.76) | 2.26<br>(0.17) | 1.93<br>(0.00) |
|              | $\chi^2$                 | 1.29           | 0.96           | 1.15           | 1.20           | 1.16           |
| <b>0.042</b> | $\tau_1$<br>$(\alpha_1)$ | 0.26<br>(0.13) | 0.19<br>(0.21) | 0.10<br>(0.47) | 0.01<br>(1.00) | 0.01<br>(1.00) |
|              | $\tau_2$<br>$(\alpha_2)$ | 9.18<br>(0.87) | 4.45<br>(0.79) | 3.11<br>(0.53) | 2.02<br>(0.00) | 1.80<br>(0.00) |
|              | $\chi^2$                 | 1.17           | 1.11           | 0.84           | 0.97           | 1.08           |



**Table S9.** Recovered Excited-State Intensity Decay Parameters for Pyrene (10  $\mu\text{M}$ ;  $\lambda_{\text{em}} = 373$  nm; excitation with a 340 nm nano-LED) Dissolved in the DES [Thy : DA (1 : 2)] at Varying Nitromethane Concentrations at Different Temperatures in the Range  $293.15 \text{ K} \leq T \leq 363.15$  K. The Errors Associated with Decay Times ( $\tau/\text{ns}$ ) and Pre-Exponential Factor ( $\alpha$ ) are  $\leq \pm 5\%$ .

| $T$ (K) |                            | $[\text{CH}_3\text{NO}_2]/\text{M}$ |                |                |                |                |
|---------|----------------------------|-------------------------------------|----------------|----------------|----------------|----------------|
|         |                            | 293.15                              | 313.15         | 333.15         | 353.15         | 363.15         |
| 0.000   | $\tau_0$<br>( $\alpha_1$ ) | 76.9<br>(1.00)                      | 51.8<br>(1.00) | 35.9<br>(1.00) | 26.2<br>(1.00) | 22.2<br>(1.00) |
|         | $\chi^2$                   | 1.30                                | 1.34           | 1.35           | 1.53           | 1.61           |
|         |                            |                                     |                |                |                |                |
| 0.005   | $\tau_1$<br>( $\alpha_1$ ) | 0.35<br>(0.03)                      | 0.32<br>(0.03) | 0.12<br>(0.14) | 0.24<br>(0.06) | 0.24<br>(0.08) |
|         | $\tau_2$<br>( $\alpha_2$ ) | 39.2<br>(0.97)                      | 27.4<br>(0.97) | 16.3<br>(0.86) | 12.3<br>(0.94) | 10.8<br>(0.92) |
|         | $\chi^2$                   | 1.09                                | 1.09           | 1.05           | 1.05           | 1.21           |
| 0.009   | $\tau_1$<br>( $\alpha_1$ ) | 0.43<br>(0.04)                      | 0.30<br>(0.06) | 0.25<br>(0.11) | 0.18<br>(0.13) | 0.21<br>(0.10) |
|         | $\tau_2$<br>( $\alpha_2$ ) | 25.5<br>(0.96)                      | 16.8<br>(0.94) | 10.2<br>(0.89) | 7.66<br>(0.87) | 7.00<br>(0.90) |
|         | $\chi^2$                   | 1.15                                | 1.11           | 1.22           | 1.25           | 1.06           |
| 0.014   | $\tau_1$<br>( $\alpha_1$ ) | 0.42<br>(0.05)                      | 0.40<br>(0.07) | 0.14<br>(0.22) | 0.09<br>(0.32) | 0.01<br>(1.00) |
|         | $\tau_2$<br>( $\alpha_2$ ) | 18.7<br>(0.95)                      | 12.3<br>(0.93) | 7.51<br>(0.78) | 5.51<br>(0.68) | 5.15<br>(0.00) |
|         | $\chi^2$                   | 1.17                                | 1.15           | 1.04           | 0.98           | 0.89           |
| 0.019   | $\tau_1$<br>( $\alpha_1$ ) | 0.33<br>(0.09)                      | 0.33<br>(0.10) | 0.01<br>(1.00) | 0.11<br>(0.30) | 0.01<br>(1.00) |
|         | $\tau_2$<br>( $\alpha_2$ ) | 14.9<br>(0.91)                      | 9.48<br>(0.90) | 6.16<br>(0.00) | 4.33<br>(0.70) | 4.03<br>(0.00) |
|         | $\chi^2$                   | 1.13                                | 1.17           | 1.05           | 1.03           | 0.99           |
| 0.023   | $\tau_1$<br>( $\alpha_1$ ) | 0.27<br>(0.09)                      | 0.36<br>(0.11) | 0.02<br>(1.00) | 0.01<br>(1.00) | 0.01<br>(1.00) |
|         | $\tau_2$<br>( $\alpha_2$ ) | 12.3<br>(0.91)                      | 7.71<br>(0.89) | 5.26<br>(0.00) | 3.56<br>(0.00) | 3.36<br>(0.00) |
|         | $\chi^2$                   | 1.25                                | 1.07           | 1.02           | 1.17           | 1.12           |
| 0.028   | $\tau_1$<br>( $\alpha_1$ ) | 0.33<br>(0.10)                      | 0.29<br>(0.15) | 0.05<br>(0.80) | 0.01<br>(1.00) | 0.01<br>(1.00) |
|         | $\tau_2$<br>( $\alpha_2$ ) | 10.5<br>(0.90)                      | 6.57<br>(0.85) | 4.50<br>(0.20) | 3.09<br>(0.00) | 2.88<br>(0.00) |
|         | $\chi^2$                   | 1.10                                | 1.12           | 1.10           | 1.18           | 1.11           |

|              |                          |                |                |                |                |                |
|--------------|--------------------------|----------------|----------------|----------------|----------------|----------------|
| <b>0.033</b> | $\tau_1$<br>$(\alpha_1)$ | 0.25<br>(0.13) | 0.21<br>(0.20) | 0.01<br>(1.00) | 0.09<br>(0.48) | 0.05<br>(0.79) |
|              | $\tau_2$<br>$(\alpha_2)$ | 9.20<br>(0.87) | 5.76<br>(0.80) | 3.91<br>(0.00) | 2.68<br>(0.52) | 2.54<br>(0.21) |
|              | $\chi^2$                 | 1.19           | 0.88           | 0.97           | 1.16           | 1.20           |
| <b>0.037</b> | $\tau_1$<br>$(\alpha_1)$ | 0.32<br>(0.14) | 0.35<br>(0.20) | 0.01<br>(1.00) | 0.09<br>(0.51) | 0.05<br>(0.86) |
|              | $\tau_2$<br>$(\alpha_2)$ | 8.38<br>(0.86) | 5.11<br>(0.80) | 3.45<br>(0.00) | 2.42<br>(0.49) | 2.31<br>(0.14) |
|              | $\chi^2$                 | 1.26           | 1.14           | 1.19           | 1.20           | 0.90           |
| <b>0.042</b> | $\tau_1$<br>$(\alpha_1)$ | 0.20<br>(0.18) | 0.22<br>(0.24) | 0.01<br>(1.00) | 0.01<br>(1.00) | 0.07<br>(0.98) |
|              | $\tau_2$<br>$(\alpha_2)$ | 7.45<br>(0.82) | 4.50<br>(0.76) | 3.04<br>(0.00) | 2.13<br>(0.00) | 2.08<br>(0.02) |
|              | $\chi^2$                 | 1.27           | 0.89           | 0.98           | 1.12           | 1.13           |

**Table S10.** Recovered Intensity Decay Parameters and Microviscosity ( $\eta_{\mu}/ns$ ) for Py-PDMS-Py (10  $\mu$ M;  $\lambda_{em} = 480$  nm; excitation with a 340 nm nano-LED) Dissolved in the Investigated DESs at Different Temperatures in the Range  $293.15 \text{ K} \leq T \leq 363.15 \text{ K}$ . Excimer Decay Time ( $\tau_E/ns$ ) is Associated with an Error of  $\leq \pm 5\%$ .

| T (K)  | DES          | Thy : Men    |               | DA : Men      |              | Thy : DA      |              |              |
|--------|--------------|--------------|---------------|---------------|--------------|---------------|--------------|--------------|
|        |              | 1 : 1        | 1 : 2         | 1 : 1         | 1 : 2        | 2 : 1         | 1 : 1        | 1 : 2        |
| 293.15 | $\tau_E$     | 32.7         | 55.8          | 51.8          | 43.4         | 52.2          | 37.1         | 48.8         |
|        | $\chi^2$     | 1.44         | 1.43          | 1.58          | 1.63         | 1.47          | 1.51         | 2.27         |
|        | $\eta_{\mu}$ | 535 $\pm$ 16 | 1929 $\pm$ 35 | 1034 $\pm$ 20 | 526 $\pm$ 12 | 1036 $\pm$ 21 | 796 $\pm$ 18 | 872 $\pm$ 20 |
| 303.15 | $\tau_E$     | 30.3         | 35.5          | 42.7          | 35.5         | 44.0          | 36.2         | 42.3         |
|        | $\chi^2$     | 1.21         | 1.34          | 1.48          | 1.41         | 1.47          | 1.45         | 2.12         |
|        | $\eta_{\mu}$ | 299 $\pm$ 10 | 822 $\pm$ 23  | 639 $\pm$ 15  | 332 $\pm$ 9  | 653 $\pm$ 16  | 572 $\pm$ 14 | 604 $\pm$ 15 |
| 313.15 | $\tau_E$     | 29.5         | 31.0          | 36.2          | 24.3         | 36.9          | 31.5         | 36.0         |
|        | $\chi^2$     | 1.12         | 1.23          | 1.44          | 1.43         | 1.38          | 1.46         | 2.00         |
|        | $\eta_{\mu}$ | 181 $\pm$ 6  | 532 $\pm$ 17  | 411 $\pm$ 11  | 176 $\pm$ 7  | 396 $\pm$ 10  | 396 $\pm$ 11 | 392 $\pm$ 11 |
| 323.15 | $\tau_E$     | 24.2         | 30.7          | 31.7          | 19.0         | 31.5          | 28.6         | 30.7         |
|        | $\chi^2$     | 1.12         | 1.21          | 1.42          | 1.42         | 1.25          | 1.23         | 1.96         |
|        | $\eta_{\mu}$ | 105 $\pm$ 4  | 375 $\pm$ 12  | 296 $\pm$ 9   | 114 $\pm$ 6  | 267 $\pm$ 9   | 289 $\pm$ 9  | 272 $\pm$ 9  |
| 333.15 | $\tau_E$     | 18.5         | 26.7          | 27.9          | 17.6         | 25.9          | 25.2         | 26.6         |
|        | $\chi^2$     | 1.14         | 1.33          | 1.34          | 1.27         | 1.17          | 1.27         | 1.86         |
|        | $\eta_{\mu}$ | 65 $\pm$ 4   | 286 $\pm$ 10  | 246 $\pm$ 9   | 93 $\pm$ 6   | 188 $\pm$ 8   | 218 $\pm$ 8  | 198 $\pm$ 7  |
| 343.15 | $\tau_E$     | 12.2         | 23.2          | 24.5          | 16.4         | 22.6          | 22.1         | 22.8         |
|        | $\chi^2$     | 1.23         | 1.43          | 1.22          | 1.37         | 1.13          | 1.33         | 1.84         |
|        | $\eta_{\mu}$ | 37 $\pm$ 3   | 222 $\pm$ 9   | 201 $\pm$ 8   | 78 $\pm$ 5   | 148 $\pm$ 8   | 166 $\pm$ 8  | 154 $\pm$ 6  |
| 353.15 | $\tau_E$     | 9.18         | 19.5          | 20.9          | 10.2         | 19.8          | 19.1         | 19.8         |
|        | $\chi^2$     | 1.15         | 1.20          | 1.67          | 1.33         | 1.03          | 1.46         | 1.81         |
|        | $\eta_{\mu}$ | 26 $\pm$ 3   | 147 $\pm$ 8   | 138 $\pm$ 7   | 46 $\pm$ 5   | 120 $\pm$ 7   | 136 $\pm$ 7  | 122 $\pm$ 6  |
| 363.15 | $\tau_E$     | 6.85         | 15.6          | 14.9          | 7.91         | 17.0          | 16.7         | 17.0         |
|        | $\chi^2$     | 1.22         | 1.24          | 1.44          | 1.47         | 1.05          | 1.67         | 1.83         |
|        | $\eta_{\mu}$ | 19 $\pm$ 2   | 108 $\pm$ 7   | 96 $\pm$ 6    | 36 $\pm$ 4   | 102 $\pm$ 6   | 113 $\pm$ 6  | 104 $\pm$ 6  |

**Table S11.** Summary of Parameters Associated with Microviscosity ( $\eta_{\mu}/\text{ns}$ ) of the Investigated

DESs According to the VFT Model Using Equation: 
$$\ln \eta_{\mu} = A + \frac{B}{T - T_0}$$

| DES       | <i>A</i>   | <i>B</i>    | <i>T</i> <sub>0</sub> /K | <i>R</i> <sup>2</sup> | <sup>a</sup> <i>E</i> <sub><i>a,ημ</i></sub> /kJ mol <sup>-1</sup> |
|-----------|------------|-------------|--------------------------|-----------------------|--------------------------------------------------------------------|
| Thy : Men |            |             |                          |                       |                                                                    |
| 1 : 1     | -9.5 ± 3.6 | 4010 ± 2046 | 39 ± 73                  | 0.9984                | 44.1 ± 17.0                                                        |
| 1 : 2     | 1.6 ± 1.2  | 489 ± 267   | 210 ± 29                 | 0.9892                | 46.6 ± 2.2                                                         |
| DA : Men  |            |             |                          |                       |                                                                    |
| 1 : 1     | -1.3 ± 3.6 | 1533 ± 1583 | 106 ± 112                | 0.9892                | 30.7 ± 13.1                                                        |
| 1 : 2     | -1.0 ± 2.2 | 895 ± 670   | 170 ± 55                 | 0.9887                | 40.4 ± 5.6                                                         |
| Thy : DA  |            |             |                          |                       |                                                                    |
| 2 : 1     | 1.7 ± 0.5  | 437 ± 103   | 209 ± 13                 | 0.9980                | 41.2 ± 1.5                                                         |
| 1 : 1     | 0.1 ± 0.7  | 1059 ± 279  | 132 ± 25                 | 0.9991                | 28.4 ± 2.5                                                         |
| 1 : 2     | 0.8 ± 0.7  | 733 ± 209   | 171 ± 21                 | 0.9983                | 33.7 ± 2.0                                                         |

<sup>a</sup>*E*<sub>*a,η*</sub> is calculated at *T* = (298.15 K). Standard deviations are given with ± sign.

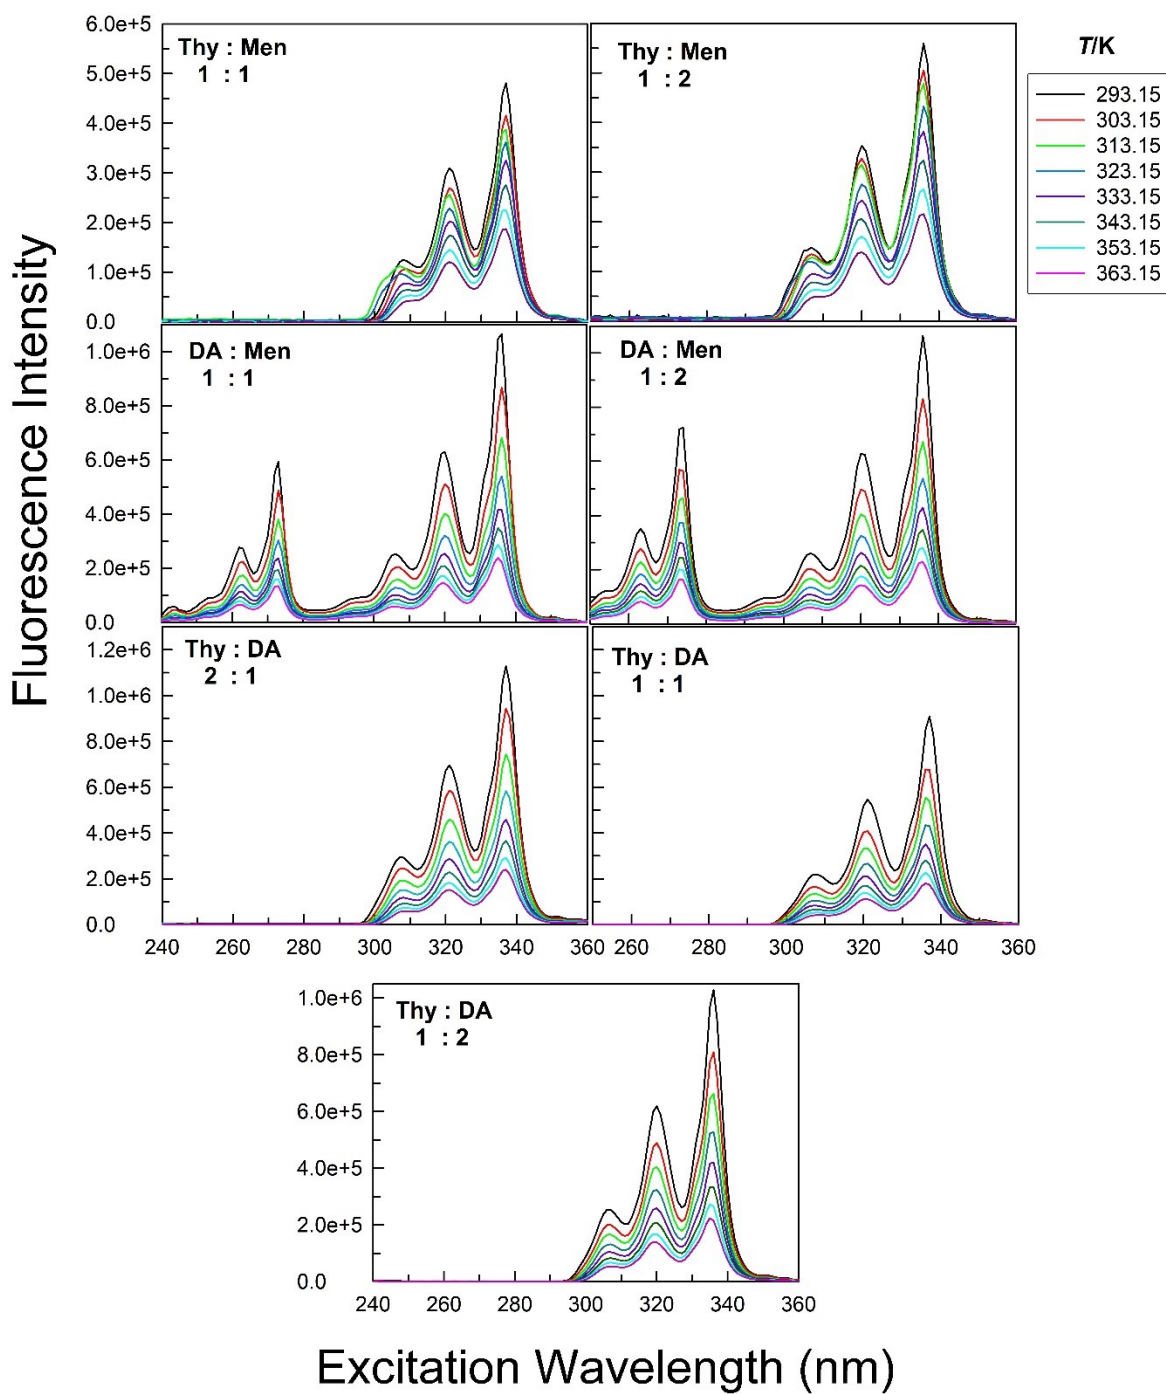

**Figure S1.** Steady-state fluorescence excitation spectra [ $\lambda_{em} = 373$  nm; excitation and emission slits are 1.0 and 1.0 nm, respectively] of pyrene ( $10 \mu\text{M}$ ) dissolved in the investigated DESs at different temperatures.

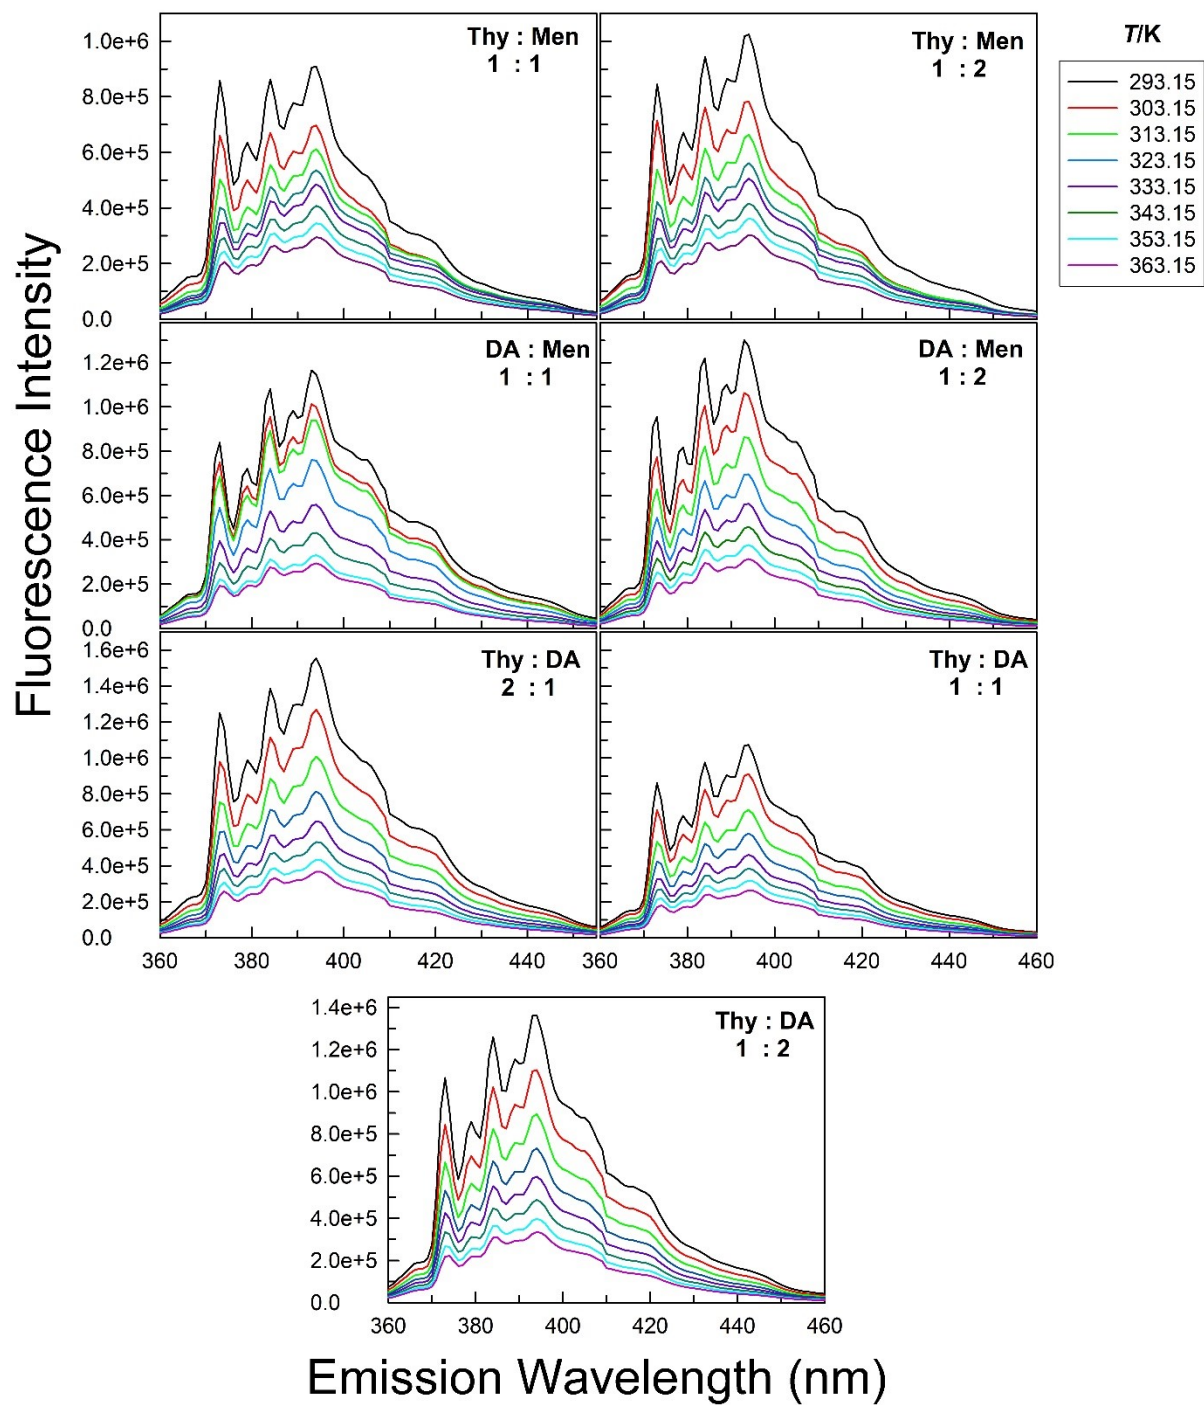

**Figure S2.** Steady-state fluorescence emission spectra [ $\lambda_{\text{ex}} = 337 \text{ nm}$ ; excitation and emission slits are 1.0 and 1.0 nm, respectively] of pyrene (10  $\mu\text{M}$ ) dissolved in the investigated DESs at different temperatures.

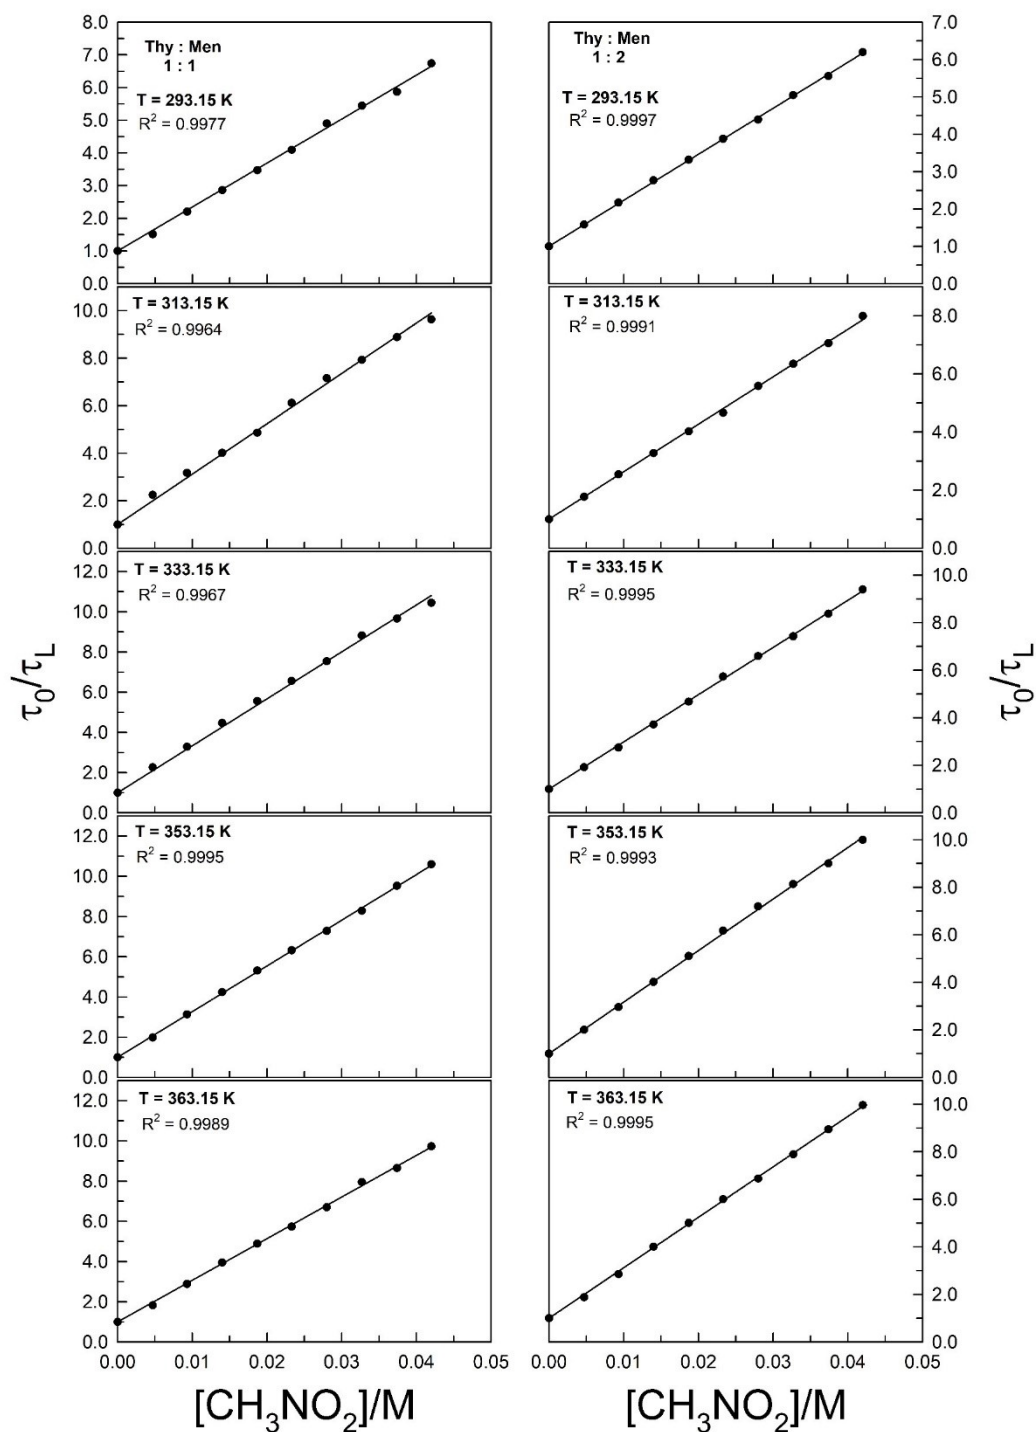

**Figure S3.** Plots of  $\tau_0/\tau$  versus [nitromethane] for pyrene (10  $\mu\text{M}$ ) within Thy : Men [1 : 1 (left) and 1 : 2 (right)] DES. Solid lines represent best fit to Stern-Volmer equation (eq 1). Estimated  $k_q$  (eq 2) at different temperatures are listed in Table 2. The error associated with  $\tau_0/\tau$  is  $\leq \pm 5\%$ .

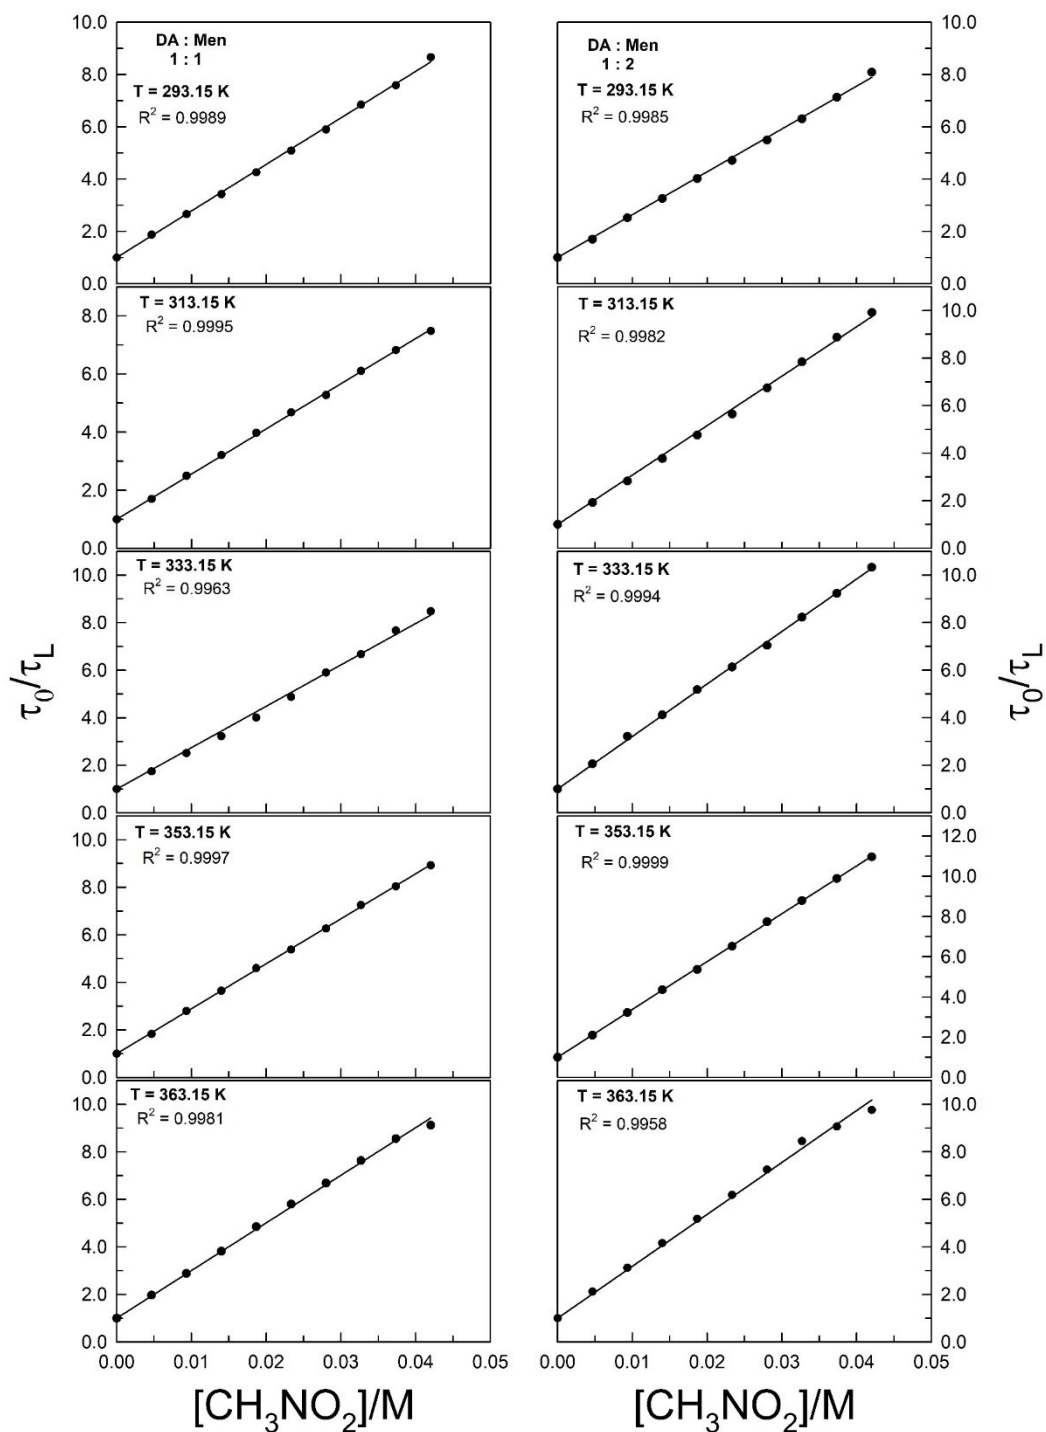

**Figure S4.** Plots of  $\tau_0/\tau$  versus [nitromethane] for pyrene (10  $\mu\text{M}$ ) within DA : Men [1 : 1 (left) and 1 : 2 (right)] DES. Solid lines represent best fit to Stern-Volmer equation (eq 1). Estimated  $k_q$  (eq 2) at different temperatures are listed in **Table 2**. The error associated with  $\tau_0/\tau$  is  $\leq \pm 5\%$ .



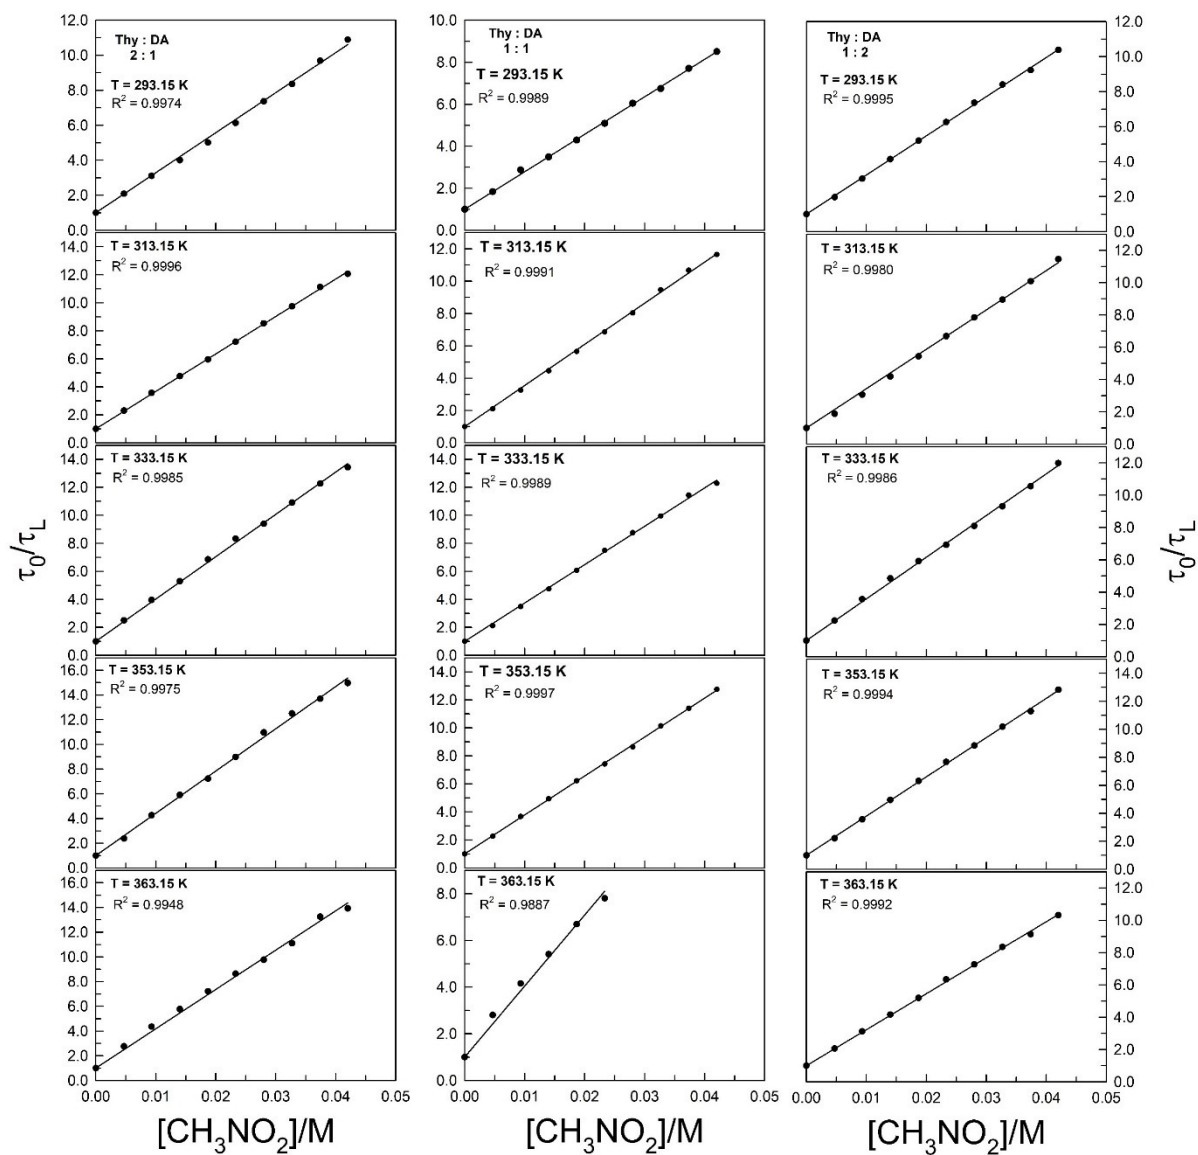

**Figure S5.** Plots of  $\tau_0/\tau$  versus [nitromethane] for pyrene (10  $\mu\text{M}$ ) within Thy : DA [2 : 1 (left), 1 : 1 (middle), and 1 : 2 (right)] DES. Solid lines represent best fit to Stern-Volmer equation (eq 1). Estimated  $k_q$  (eq 2) at different temperatures are listed in **Table 2**. The error associated with  $\tau_0/\tau$  is  $\leq \pm 5\%$ .

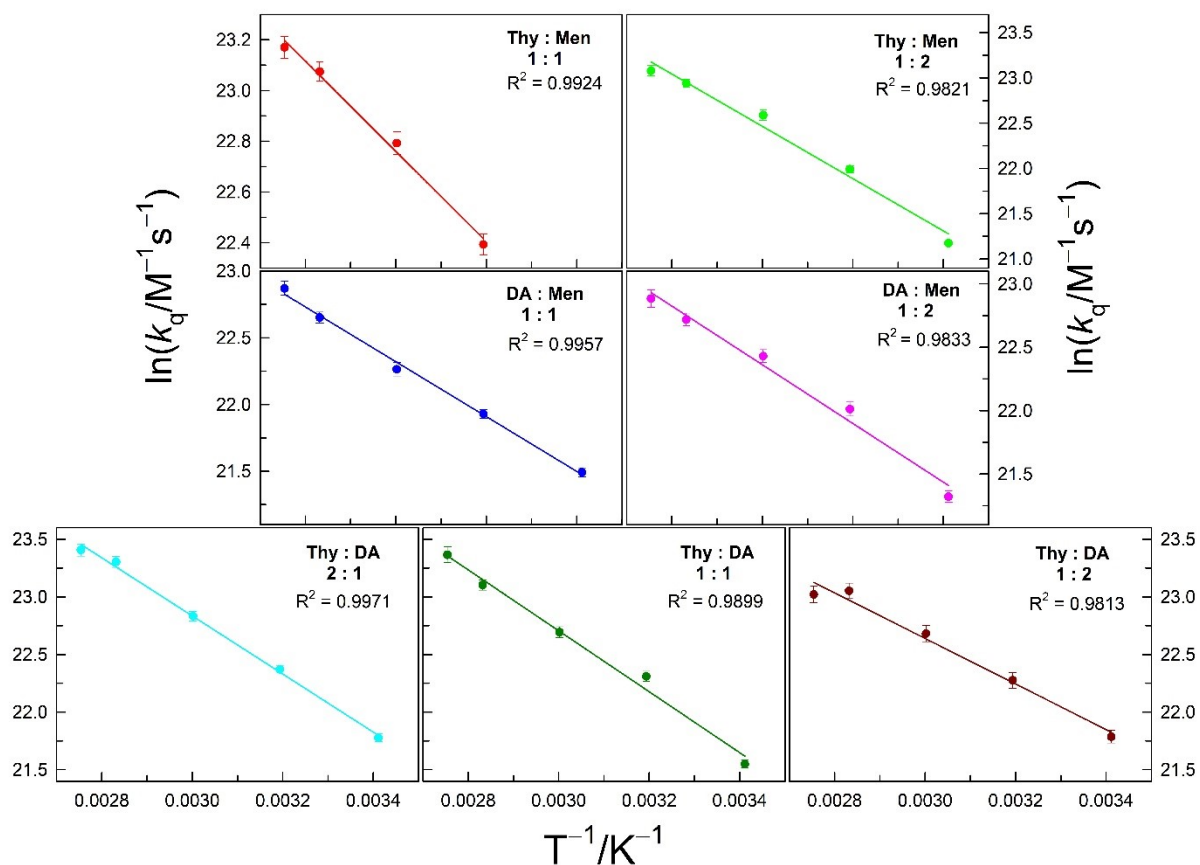

**Figure S6.** Variation of  $\ln k_q$  with  $1/T$  for pyrene-nitromethane fluorophore-quencher pair dissolved in the investigated DESs. Solid lines represent linear fit in agreement with empirical Arrhenius law. Recovered parameters – activation energy ( $E_a$ ) and  $\ln A$  are listed in **Table 3**.

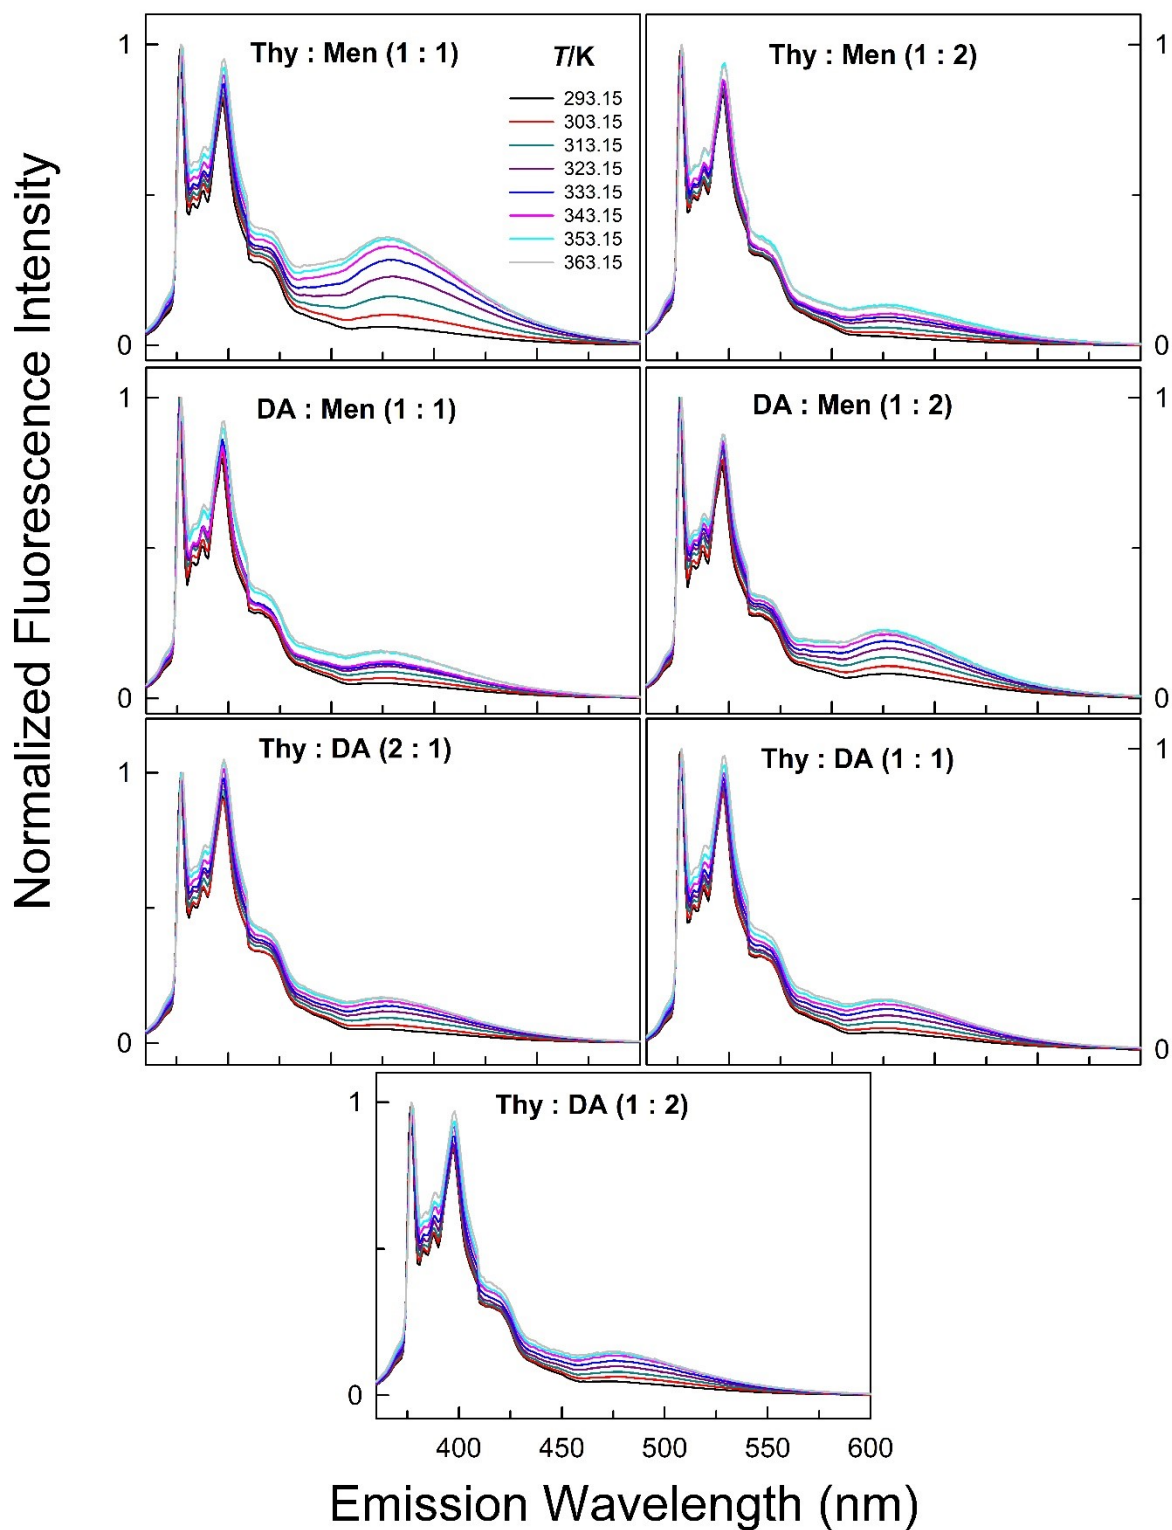

**Figure S7.** Normalized Fluorescence emission spectra of Py-PDMS-Py ( $10 \mu\text{M}$ ,  $\lambda_{\text{ex}} = 340 \text{ nm}$ ; excitation and emission slits are 1.0 and 1.0 nm, respectively) dissolved in the investigated DESs at different temperatures (293.15 K – 363.15 K).

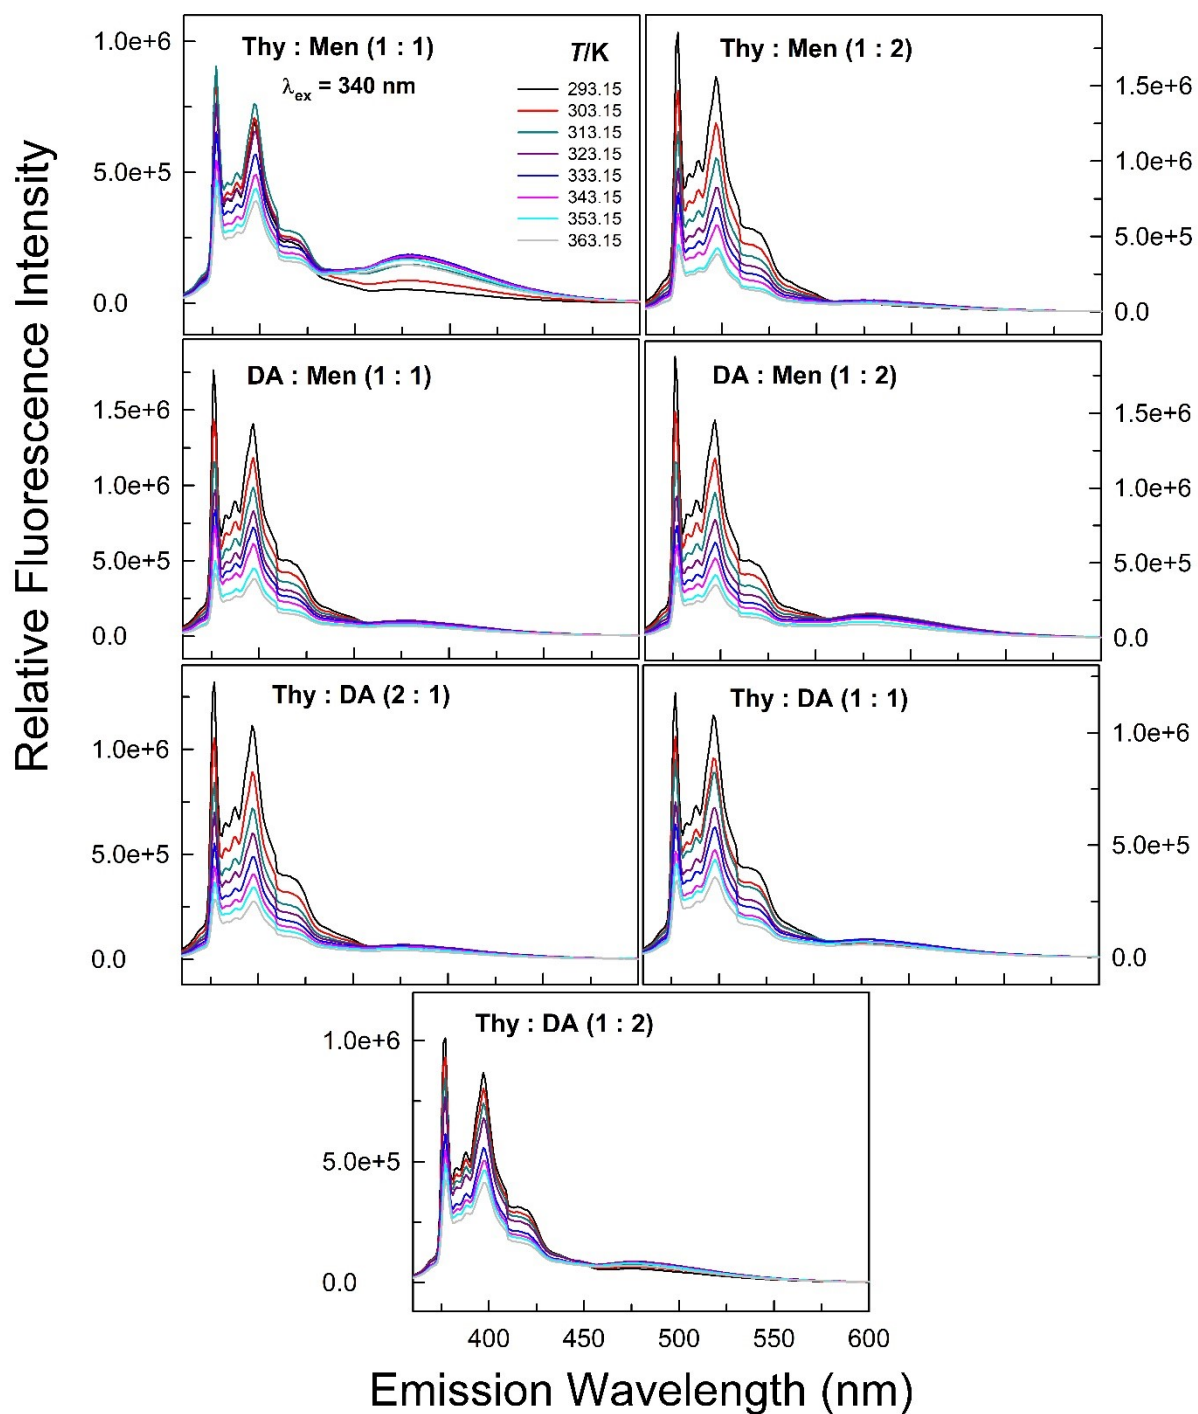

**Figure S8.** Relative Fluorescence emission spectra of Py-PDMS-Py (10  $\mu\text{M}$ ,  $\lambda_{\text{ex}} = 340 \text{ nm}$ ; excitation and emission slits are 1.0 and 1.0 nm, respectively) dissolved in the investigated DESs at different temperatures (293.15 K – 363.15 K).

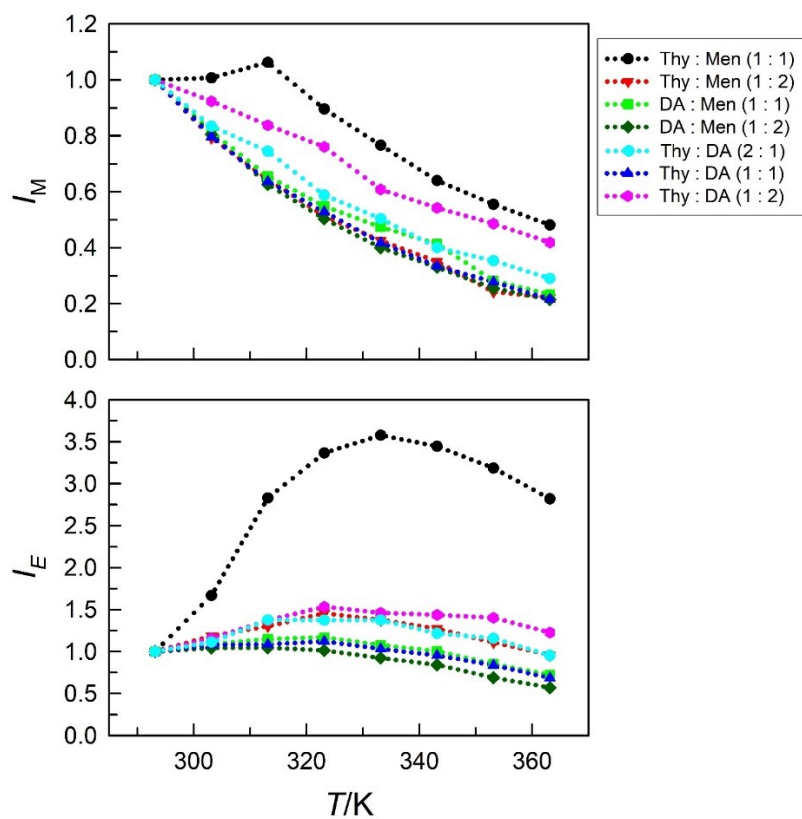

**Figure S9.** Variation of  $I_M$  and  $I_E$  with temperature for Py-PDMS-Py dissolved in the investigated DESs. The error associated with  $I_M$  and  $I_E$  is  $\leq \pm 5\%$ .

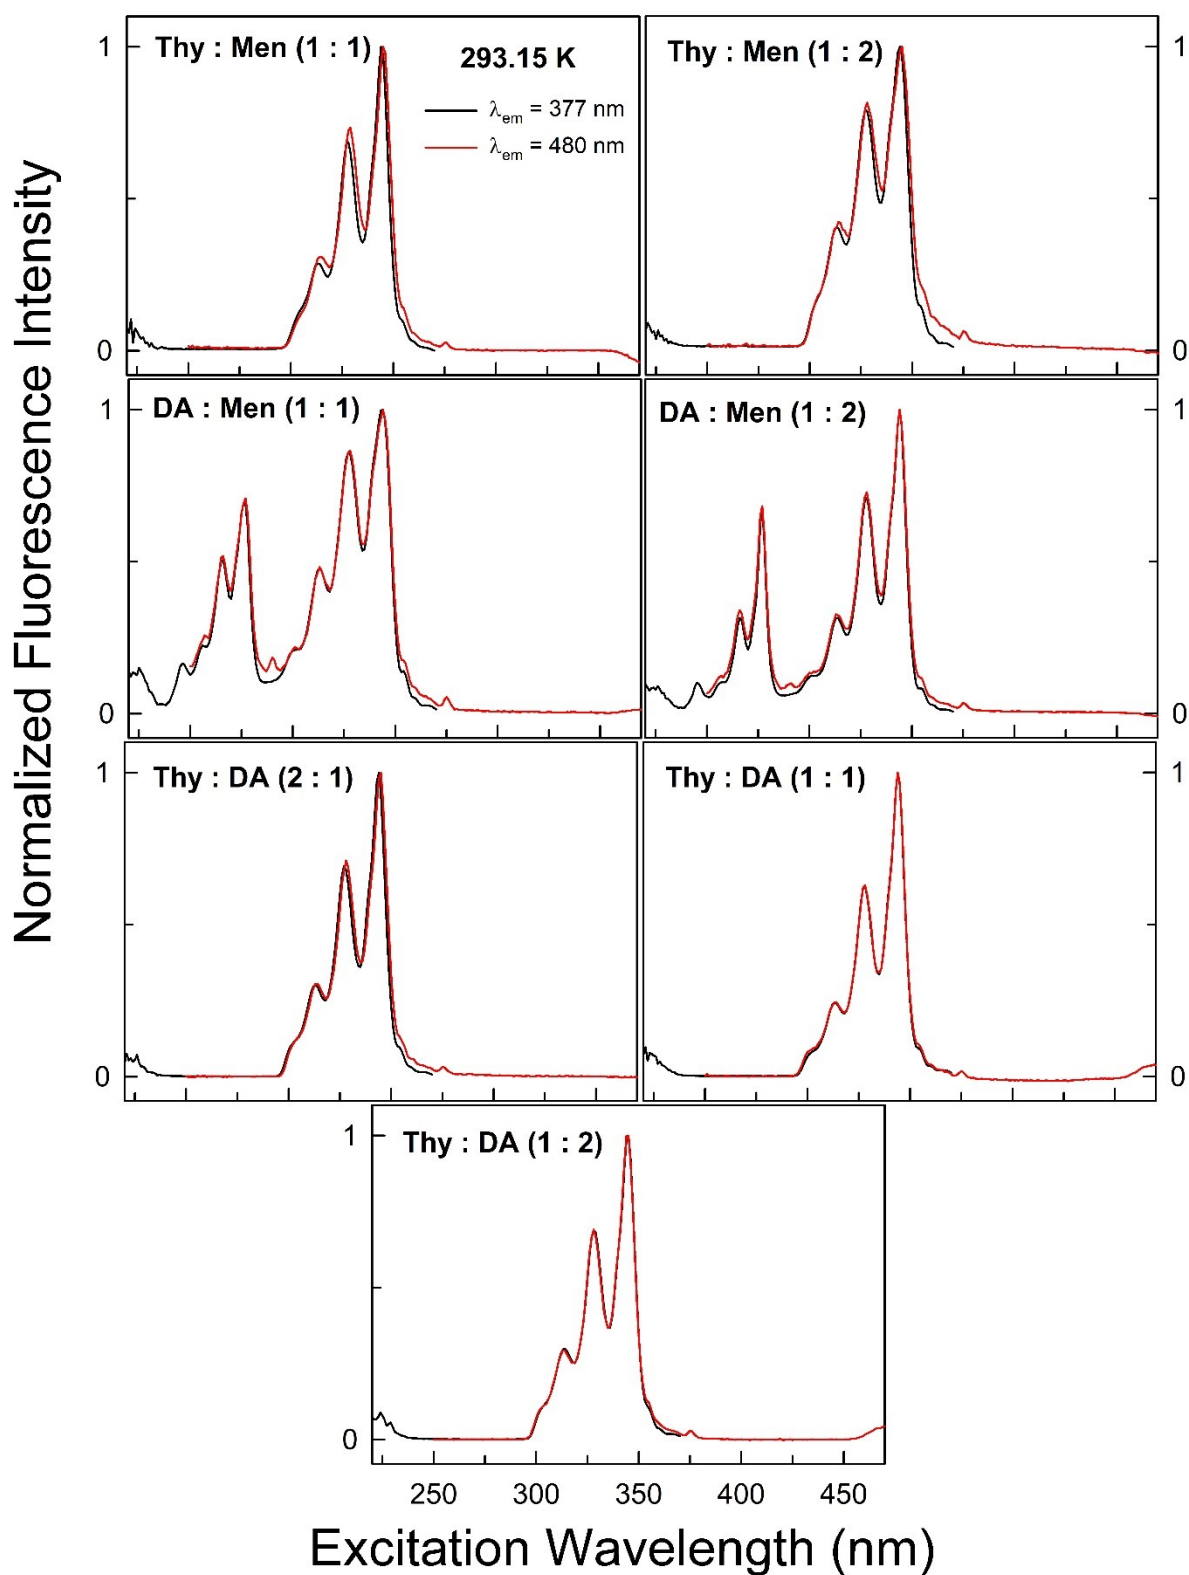

**Figure S10.** Normalized Fluorescence excitation spectra of Py-PDMS-Py (10  $\mu\text{M}$ ) dissolved in the investigated DESs; obtained with emission wavelengths fixed at 377 nm and 480 nm (emission and excitation slits are 1.0 and 1.0 nm, respectively) at 293.15 K.

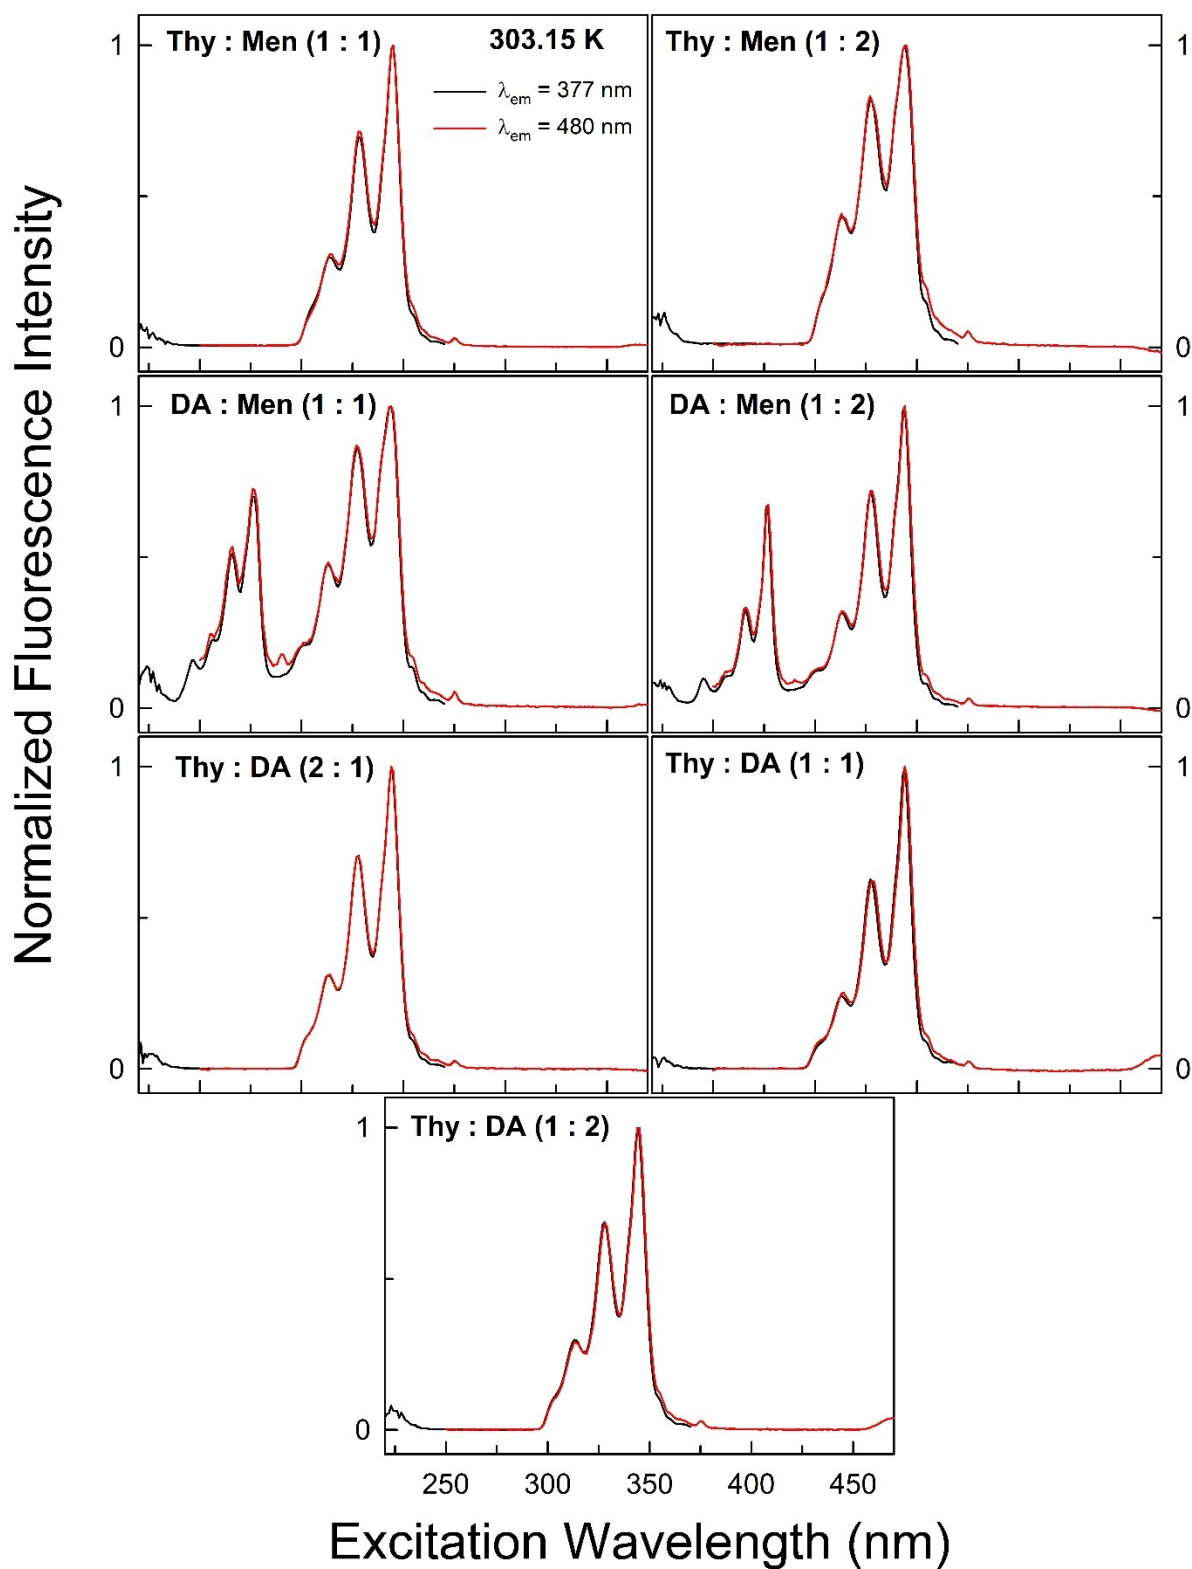

**Figure S11.** Normalized Fluorescence excitation spectra of Py-PDMS-Py (10  $\mu$ M) dissolved in the investigated DESs; obtained with emission wavelengths fixed at 377 nm and 480 nm (emission and excitation slits are 1.0 and 1.0 nm, respectively) at 303.15 K.

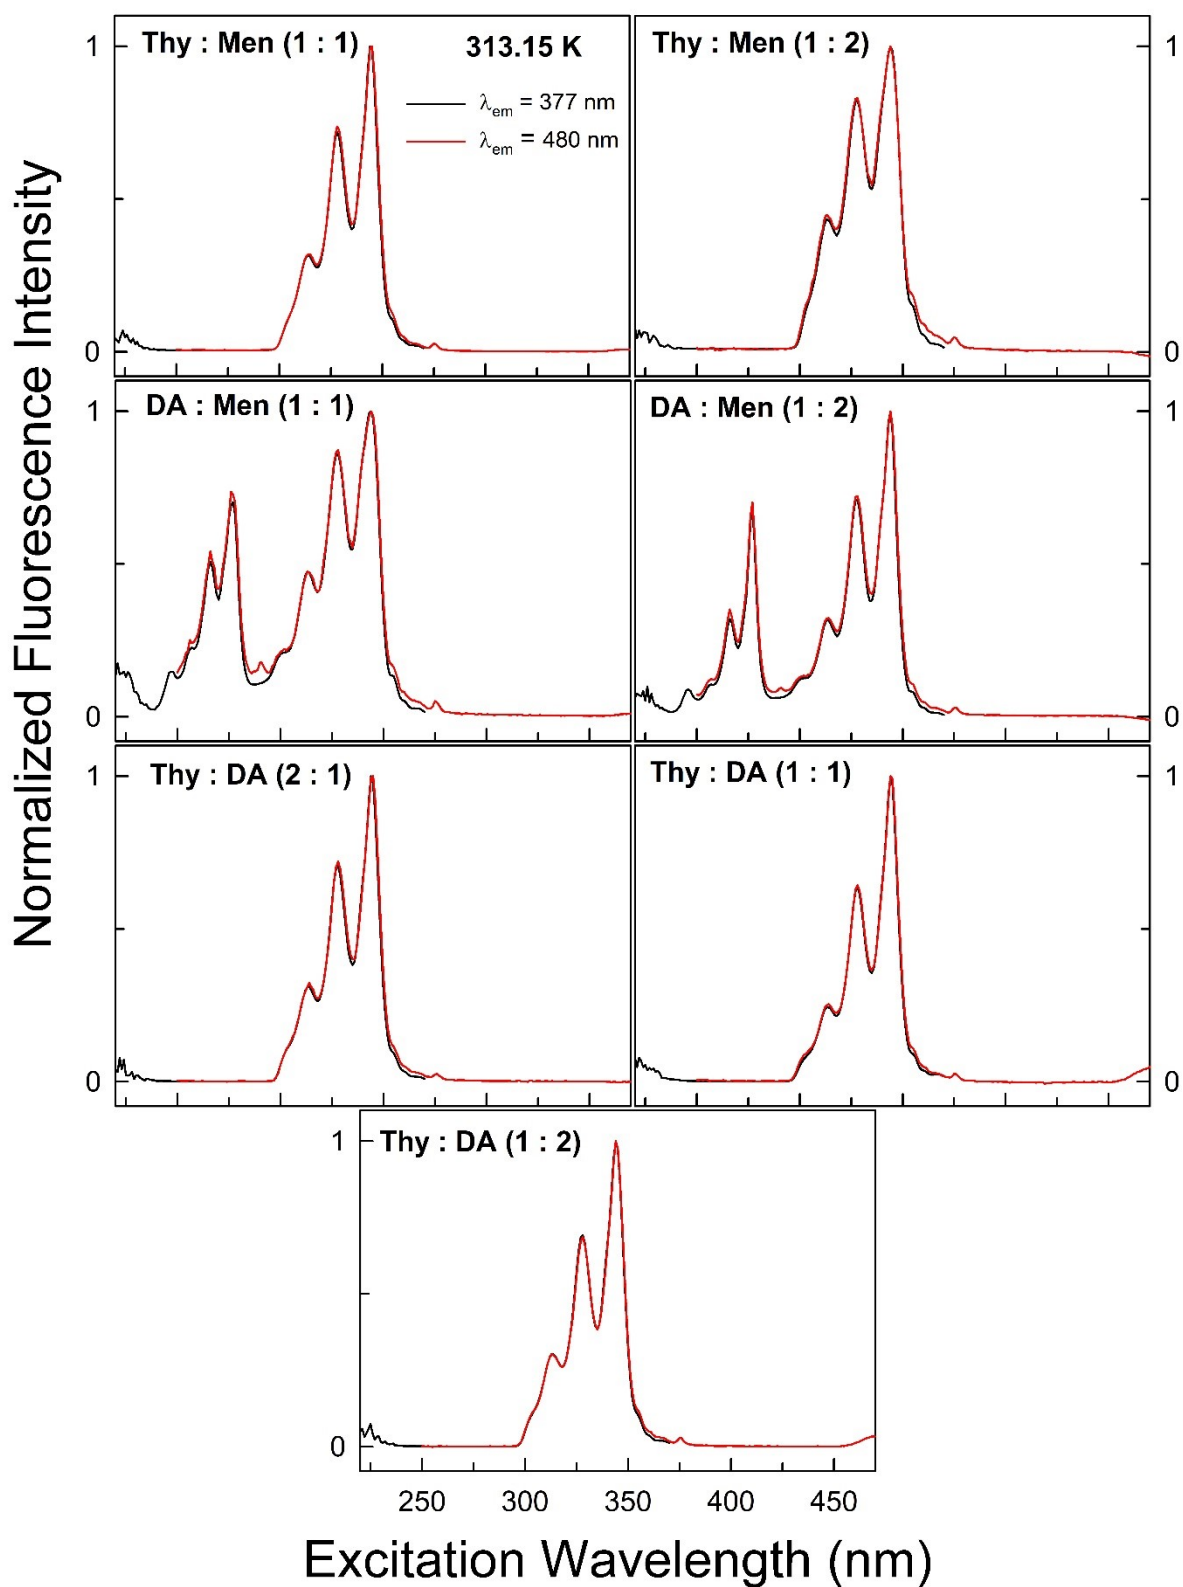

**Figure S12.** Normalized Fluorescence excitation spectra of Py-PDMS-Py (10  $\mu\text{M}$ ) dissolved in the investigated DESs; obtained with emission wavelengths fixed at 377 nm and 480 nm (emission and excitation slits are 1.0 and 1.0 nm, respectively) at 313.15 K.



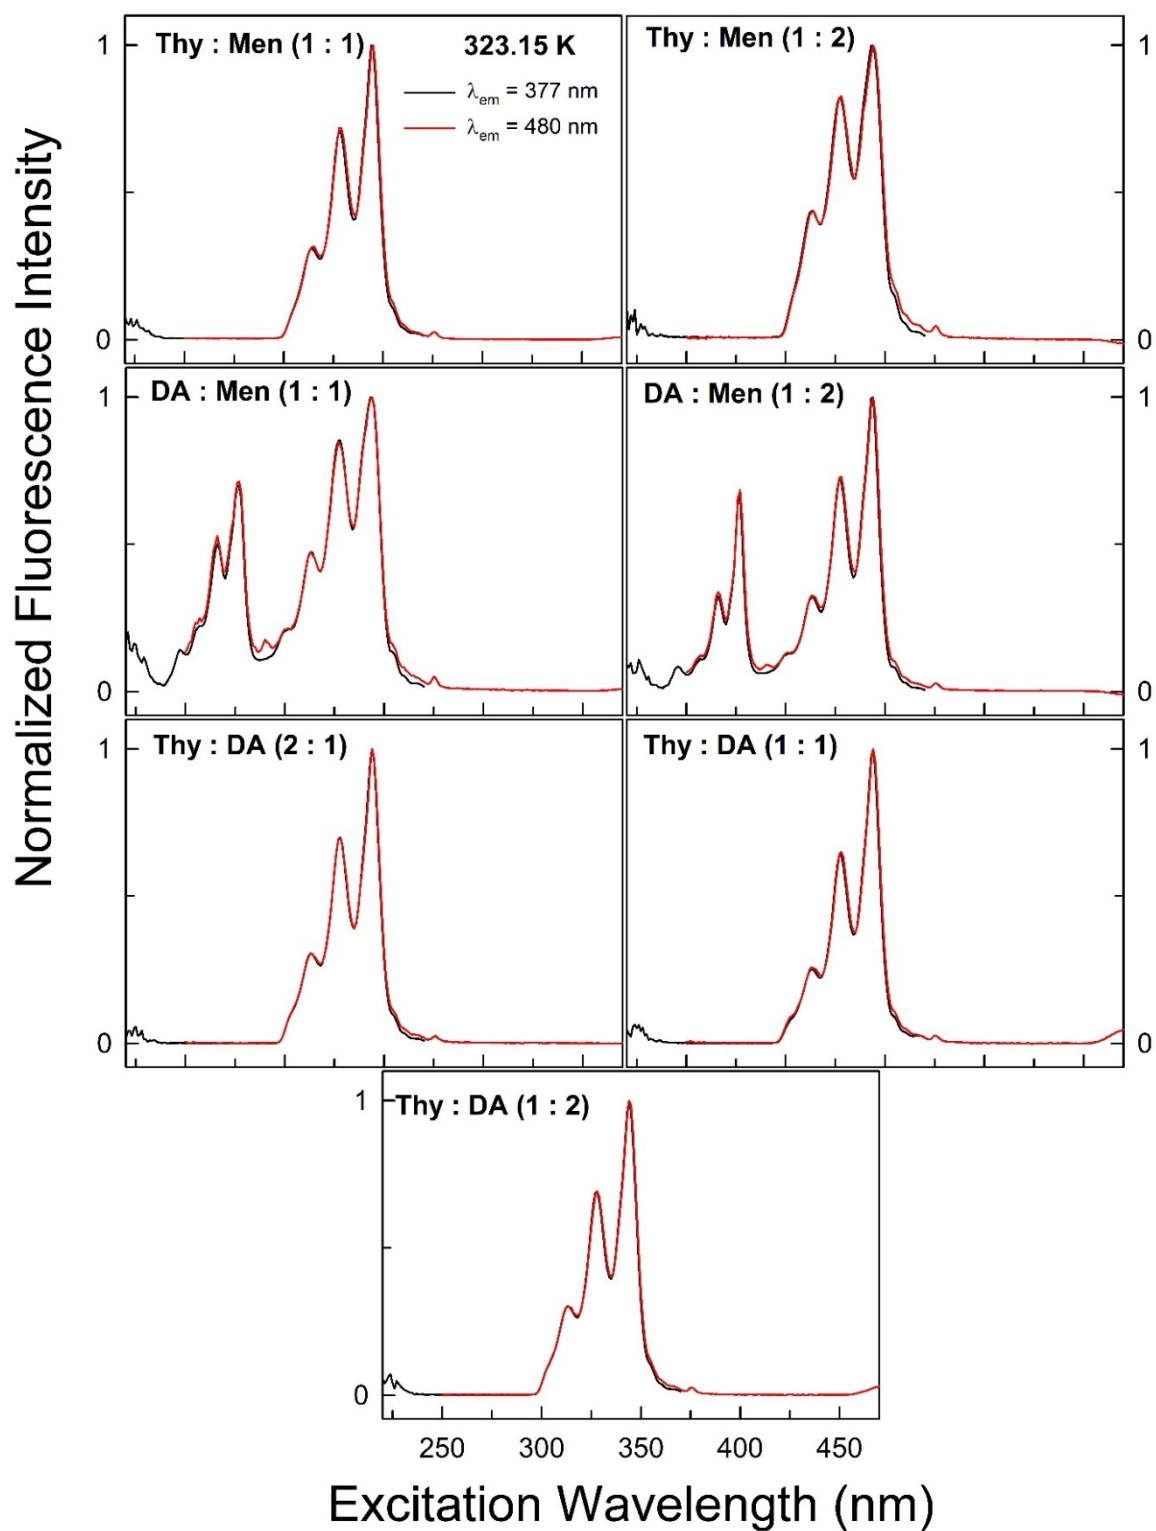

**Figure S13.** Normalized Fluorescence excitation spectra of Py-PDMS-Py (10  $\mu\text{M}$ ) dissolved in the investigated DESs; obtained with emission wavelengths fixed at 377 nm and 480 nm (emission and excitation slits are 1.0 and 1.0 nm, respectively) at 323.15 K.

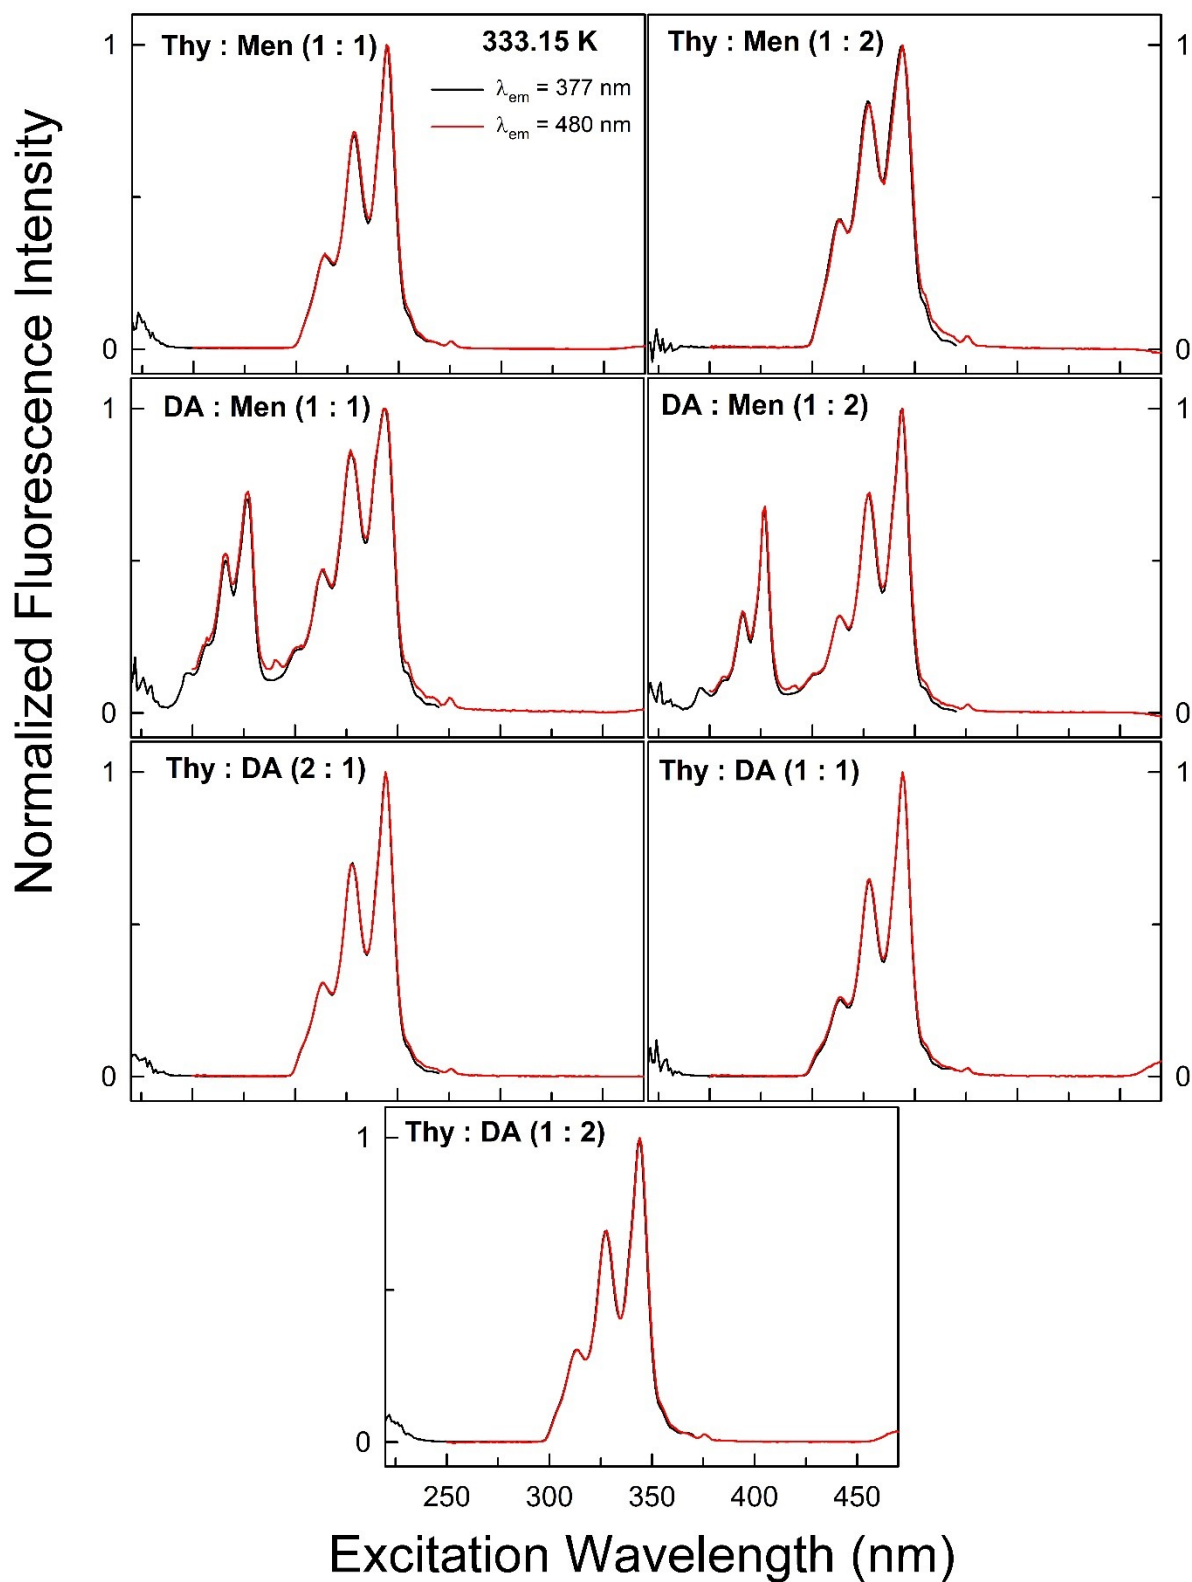

**Figure S14.** Normalized Fluorescence excitation spectra of Py-PDMS-Py (10  $\mu$ M) dissolved in the investigated DESs; obtained with emission wavelengths fixed at 377 nm and 480 nm (emission and excitation slits are 1.0 and 1.0 nm, respectively) at 333.15 K.

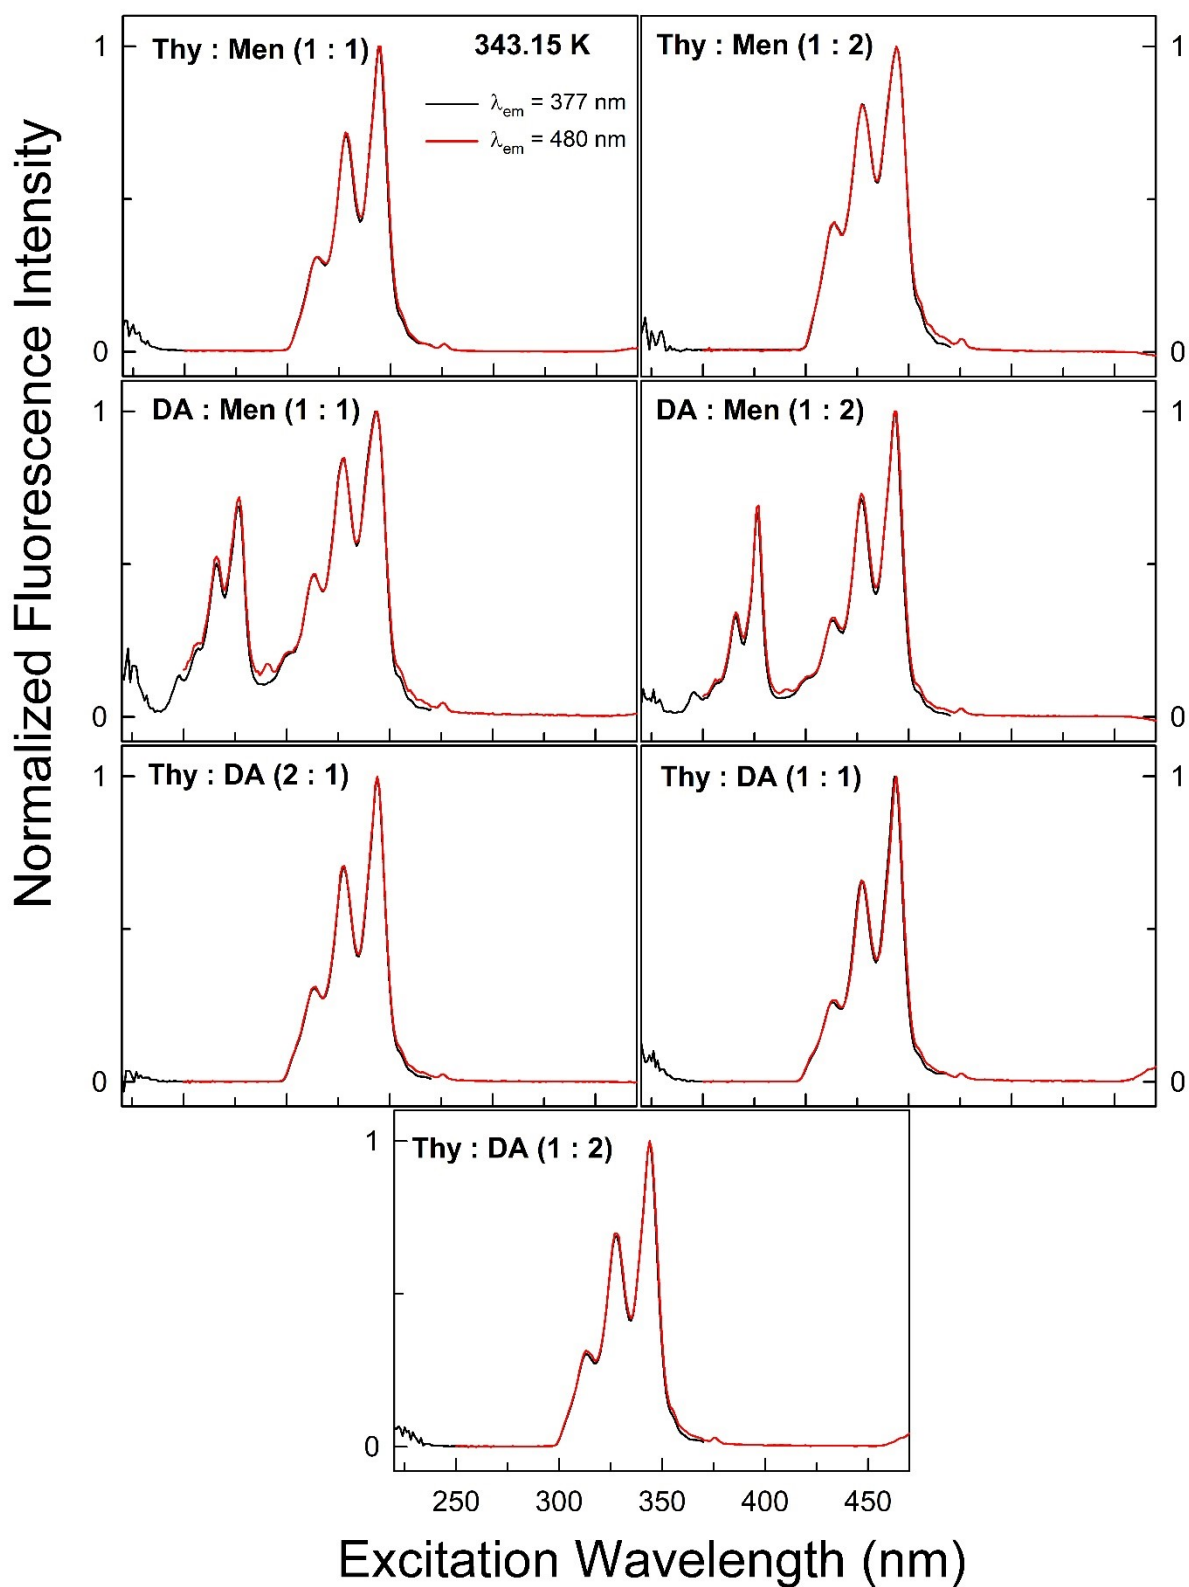

**Figure S15.** Normalized Fluorescence excitation spectra of Py-PDMS-Py (10  $\mu$ M) dissolved in the investigated DESs; obtained with emission wavelengths fixed at 377 nm and 480 nm (emission and excitation slits are 1.0 and 1.0 nm, respectively) at 343.15 K.

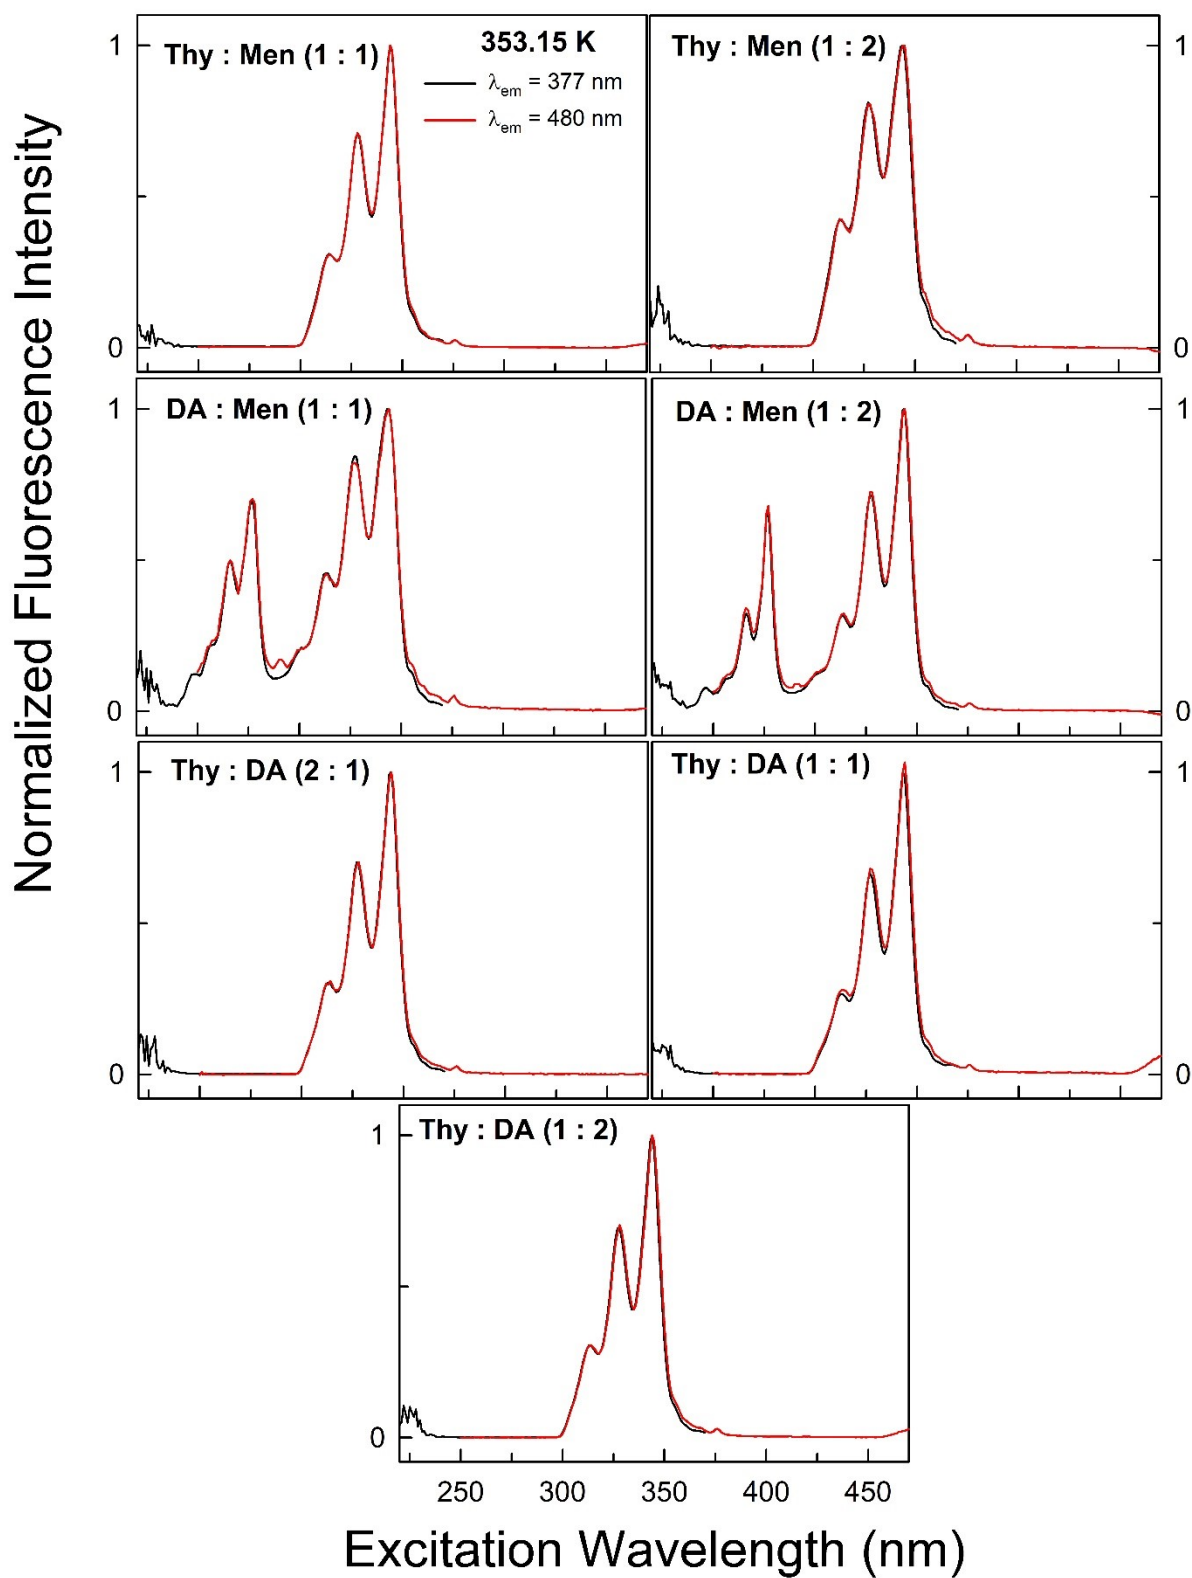

**Figure S16.** Normalized Fluorescence excitation spectra of Py-PDMS-Py (10  $\mu$ M) dissolved in the investigated DESs; obtained with emission wavelengths fixed at 377 nm and 480 nm (emission and excitation slits are 1.0 and 1.0 nm, respectively) at 353.15 K.

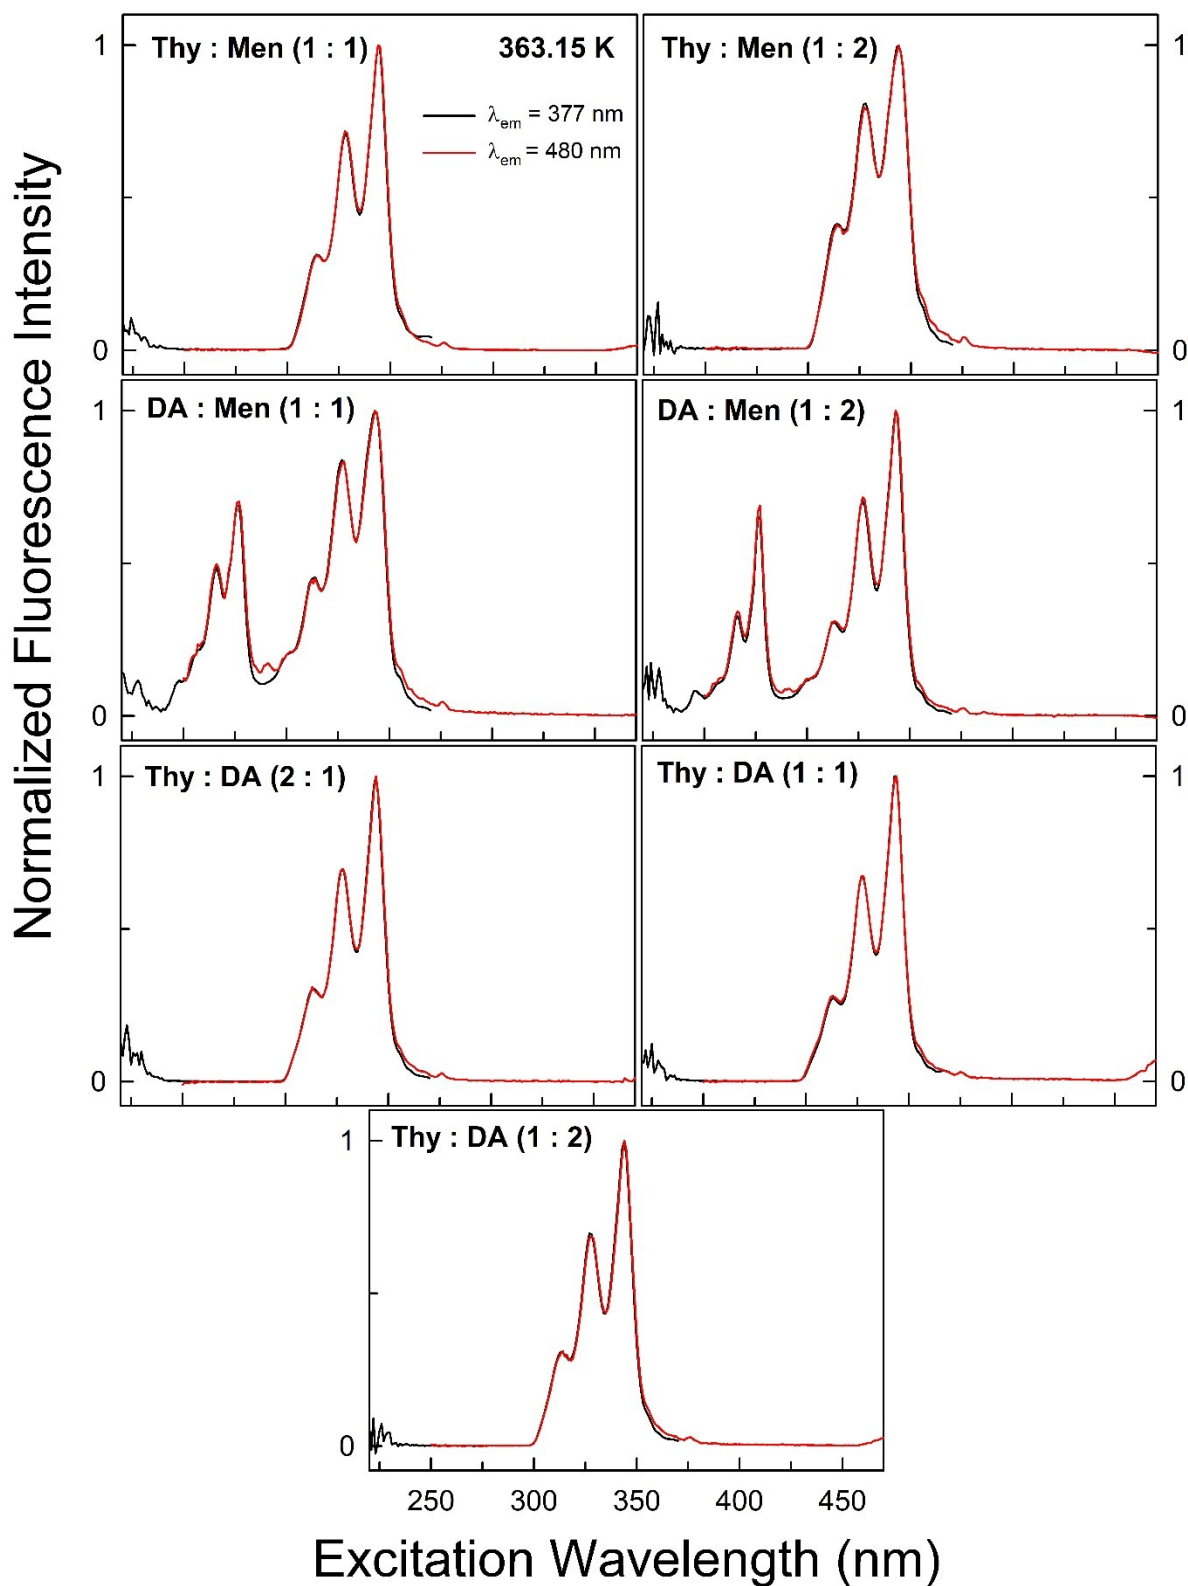

**Figure S17.** Normalized Fluorescence excitation spectra of Py-PDMS-Py (10  $\mu\text{M}$ ) dissolved in the investigated DESs; obtained with emission wavelengths fixed at 377 nm and 480 nm (emission and excitation slits are 1.0 and 1.0 nm, respectively) at 363.15 K.
